# Supplementary material for: Allelopathic Potential of Rice and Identification of Published Allelochemicals by Cloud-Based Metabolomics Platform
Source: PubMed Central journal article supplement (PMC7344986; doi:10.3390/metabo10060244), 2020-06-15
Supplement: metabolites-10-00244-s001.pdf [file metabolites-10-00244-s001.pdf]

# **Allelopathic potential of rice and identification of published allelochemicals by cloud-based metabolomics platform**

Ho Le Thi<sup>1\*</sup>, Nguyen Thi Cam Tu<sup>2</sup>, Danh C. Vu<sup>3</sup>, Nguyen Y Nhu<sup>4</sup>, Nguyen Thi Thu Trang<sup>5</sup>, Phong Ngoc Hai Trieu<sup>1</sup>, Nguyen The Cuong<sup>1</sup>, Chung-Ho Lin<sup>4</sup>, Zhentian Lei<sup>6</sup>, Lloyd W. Sumner<sup>6,7</sup>, Le Van Vang<sup>2</sup>

<sup>1</sup>Cuu Long Delta Rice Research Institute, Can Tho, Vietnam

<sup>2</sup>College of Agriculture and Applied Biosciences – Can Tho University, Vietnam

<sup>3</sup>Faculty of Technology, Van Lang University, Ho Chi Minh City, Vietnam

<sup>4</sup>Center for Agroforestry, School of Natural Resources, University of Missouri, Columbia, MO, USA

<sup>5</sup>Cultivation and Plant Protection Station. Thoi Lai District, Can Tho City

<sup>6</sup>Metabolomics Center, University of Missouri, Columbia, MO, USA

<sup>7</sup>Department of Biochemistry, Bond Life Sciences Center, University of Missouri, Columbia, MO, USA

\*Corresponding author:

Phone: (+84) 944 376 329

Email: [thihl.clrri@mard.gov.vn](mailto:thihl.clrri@mard.gov.vn)

**Table S1. Major previously-reported allelochemicals in *Oryza sativa* L. species**

| No. | Identified chemical                                                                    | Organ       | Reference                                                     |
|-----|----------------------------------------------------------------------------------------|-------------|---------------------------------------------------------------|
| 1   | 1,2-benzenedicarboxylic acid, bis (2-ethylhexyl) ester                                 | Root        | Rimando <i>et al.</i> (2001)                                  |
| 2   | 12-methyl-tetradecanoic acid, methyl ester                                             | Root        | Kim and Kim (2000)                                            |
| 3   | 12-octadecenoic acid, methyl ester                                                     | Root        | Kim and Kim (2000)                                            |
| 4   | 1-eicosanol                                                                            | Root        | Kim and Kim (2000)                                            |
| 5   | 1-ethyl-3,5-dimethylbenzene                                                            | Root        | Kim and Kim (2000)                                            |
| 6   | 1H-indole-3-carboxaldehyde                                                             | Root        | Rimando <i>et al.</i> (2001)                                  |
| 7   | 1H-indole-3-carboxylic acid                                                            | Root        | Rimando <i>et al.</i> (2001)                                  |
| 8   | 1H-indole-5-carboxylic acid                                                            | Root        | Rimando <i>et al.</i> (2001)                                  |
| 9   | 1-phenyl-2-hydroxy-3,7-dimethyl-11-aldehydic-tetradecane-2- $\beta$ -D-glucopyranoside | Stem        | Chung <i>et al.</i> (2006a)                                   |
| 10  | 1-tetratriacontanol                                                                    | Root        | Bouillant <i>et al.</i> (1994)                                |
| 11  | 2- hydroxyphenylacetic acid                                                            | Root        | Seal <i>et al.</i> (2004b),<br>Kim and Kim (2000)             |
| 12  | 2-methyl-1,4-benzenediol                                                               | Root        | Kim and Kim (2000)                                            |
| 13  | 3,4-dihydroxyhydrocinnamic acid                                                        | Root        | Rimando <i>et al.</i> (2001)                                  |
| 14  | 3-epicosene (3-eicosene)                                                               | Root        | Kim and Kim (2000)                                            |
| 15  | 3-hydroxy-4-methoxybenzoic acid (isovanillic acid)                                     | Root        | Mattice <i>et al.</i> (1998);<br>Rimando <i>et al.</i> (2001) |
| 16  | 3-hydroxybenzoic acid                                                                  | Root        | Mattice <i>et al.</i> (1998)                                  |
| 17  | 3-hydroxy- $\beta$ -ionone                                                             | Whole plant | Kato-Noguchi <i>et al.</i> (2011)                             |
| 18  | 3-isopropyl-5-acetoxycyclohexene-2-one-1 (Cyclohexenone)                               | Root        | Kong <i>et al.</i> (2004a)                                    |
| 19  | 4-ethylbenzaldehyde                                                                    | Root        | Mattice <i>et al.</i> (1998),<br>Kim and Kim (2000)           |
| 20  | 4-hydroxybenzaldehyde                                                                  | Root        | Mattice <i>et al.</i> (1998)                                  |
| 21  | 4-hydroxybenzoic acid                                                                  | Root        | Mattice <i>et al.</i> (1998)                                  |
| 22  | 4-hydroxycinnamic acid                                                                 | Root        | Rimando <i>et al.</i> (2001)                                  |
| 23  | 4-hydroxyhydrocinamic acid                                                             | Root        | Rimando <i>et al.</i> (2001)                                  |
| 24  | 4-hydroxyphenylacetic acid                                                             | Root        | Bouillant <i>et al.</i> (1994)                                |
| 25  | 4-phenylbutyric acid                                                                   | Root        | Seal <i>et al.</i> (2004b);<br>Bouillant <i>et al.</i> (1994) |
| 26  | 4-vinylphenol                                                                          | Whole plant | Song <i>et al.</i> (2004)                                     |
| 27  | 5-(12-heptadecenyl)-resorcinol (Alkyl resorcinol)                                      | Root        | Bouillant <i>et al.</i> (1994)                                |

|    |                                                                    |                                      |                                                               |
|----|--------------------------------------------------------------------|--------------------------------------|---------------------------------------------------------------|
| 28 | 5,4'-dihydroxy-3',5'-dimethoxy-7-O- $\beta$ -glucopyranosylflavone | Root                                 | Kong <i>et al.</i> (2004a, b)                                 |
| 29 | 4',5-dihydroxy-7-methoxyflavanone                                  | Seedling                             | Kato-Noguchi <i>et al.</i> (2010)                             |
| 30 | 4',5,7-trihydroxy-3',5'-dimethoxyflavone                           | Root                                 | Kong <i>et al.</i> (2004a)                                    |
| 31 | 5-hydroxyindole-2-carboxylic acid                                  | Whole plant                          | Song <i>et al.</i> (2004)                                     |
| 32 | 5-hydroxyindole-3-acetic acid                                      | Root                                 | Seal <i>et al.</i> (2004b);<br>Bouillant <i>et al.</i> (1994) |
| 33 | 7-hexadecenoic acid, methyl ester                                  | Root                                 | Kim and Kim (2000)                                            |
| 34 | 7-oxo-stigmasterol                                                 | Fresh root, leaf and stem            | Macias <i>et al.</i> (2006)                                   |
| 35 | 9,12-octadecadienoic acid                                          | Root                                 | Kim and Kim (2000)                                            |
| 36 | 9-hydroxy-4-megastigmen-3-one                                      | Whole plant                          | Kato-Noguchi <i>et al.</i> (2011)                             |
| 37 | Abietic acid                                                       | Root                                 | Seal <i>et al.</i> (2004b)                                    |
| 38 | Aliphatic acids                                                    | Root                                 | Kong <i>et al.</i> (2004a)                                    |
| 39 | Alkaloid A (dẫn xuất của Alkaloids)                                | Seedling incubated in dark condition | Suzuki <i>et al.</i> (1996)                                   |
| 40 | Alkylresorcinols                                                   | Husk and root                        | Suzuki <i>et al.</i> , 1996; 1998                             |
| 41 | Azelaic acid                                                       | Root                                 | Rimando <i>et al.</i> (2001)                                  |
| 42 | Benzoic acid                                                       | Root                                 | Kuwatsuka and Shindo (1973)                                   |
| 43 | Blumenal A                                                         | Root                                 | Kato-Noguchi <i>et al.</i> (2012)                             |
| 44 | Caffeic acid                                                       | Husk                                 | Kuwatsuka and Shindo (1973)                                   |
|    |                                                                    | Root                                 | Seal <i>et al.</i> (2004a)                                    |
| 45 | Cholest-5-en-3( $\beta$ )-ol                                       | Root                                 | Kim and Kim (2000)                                            |
| 46 | Cinnamic aldehyde                                                  | Root                                 | Kim and Kim (2000)                                            |
| 47 | <i>cis</i> -1-butyl-2-methylcyclopropane                           | Root                                 | Kim and Kim (2000)                                            |
| 48 | Cytokinin                                                          | Root                                 | Soejima <i>et al.</i> (1992)                                  |
| 49 | Dehydroabietic acid                                                | Root                                 | Kim and Kim (2000)                                            |
| 50 | Dicyclohexyl orizane                                               | Root                                 | Bouillant <i>et al.</i> (1994)                                |
| 51 | Diterpenoids                                                       | Whole plant                          |                                                               |
| 52 | Ergosterol peroxide                                                | Fresh root, leaf and stem            | Macias <i>et al.</i> (2006)                                   |
| 53 | Ethyl-4-( <i>o</i> -nitrophenyl)-3-thioallophanate                 | Husk and root                        | Kong <i>et al.</i> (2002b)                                    |
| 54 | Ethyl-4-( <i>o</i> -nitrophenyl)-3-allophanate                     | Husk and root                        | Kong <i>et al.</i> (2002b)                                    |
| 55 | Ferulic acid                                                       | Decomposed husk                      | Chou & Lin (1976)                                             |
|    |                                                                    | Leaf and stem                        | Chou <i>et al.</i> (1991)                                     |
| 56 | Flavonoid                                                          | Root                                 | Kong <i>et al.</i> (2004a)                                    |
| 57 | Gallic acid                                                        | Leaf and stem                        | Chou <i>et al.</i> (1991)                                     |
| 58 | Gentisic acid                                                      | Husk                                 | Kuwatsuka and Shindo (1973)                                   |
| 59 | Grasshopper ketone                                                 | Root                                 | Kato-Noguchi <i>et al.</i>                                    |

|    |                                                                                    |                      |                                                                 |
|----|------------------------------------------------------------------------------------|----------------------|-----------------------------------------------------------------|
|    |                                                                                    |                      | (2012)                                                          |
| 60 | Indole-5-carboxylic acid                                                           | Root                 | Seal <i>et al.</i> (2004b),<br>Bouillant <i>et al.</i> (1994)   |
| 61 | Lanast-7,9(11)-dien3 $\alpha$ ,15 $\alpha$ -diol-3 $\alpha$ -D-<br>glucofuranoside | Stem                 | Chung <i>et al.</i> (2006a)                                     |
| 62 | Mandelic acid                                                                      | Decomposed husk      | Chou and Lin (1976)                                             |
| 63 | <i>m</i> -coumaric acid                                                            | Leaf and stem        | Chou <i>et al.</i> (1991)                                       |
| 64 | Mercaptoacetic acid                                                                | Whole plant          | Song <i>et al.</i> (2004)                                       |
| 65 | Momilactone A                                                                      | Whole plant          | Kato-Noguchi (2008b)                                            |
| 66 | Momilactone B                                                                      | Stem                 | Cartwright <i>et al.</i> (1981),<br>Chung <i>et al.</i> (2005a) |
|    |                                                                                    | Leaf and husk        | Kato <i>et al.</i> (1973)                                       |
|    |                                                                                    | Root                 | Kato-Noguchi and Ino<br>(2003, 2005)                            |
| 67 | <i>N-trans</i> -cinnamoyltyramine                                                  | Whole plant (OM5930) | Ho Le Thi <i>et al.</i> (2014)                                  |
| 68 | <i>o</i> -coumaric acid                                                            | Leaf and stem        | Chou <i>et al.</i> (1991)                                       |
| 69 | Octadecane                                                                         | Root                 | Kim and Kim (2000)                                              |
| 70 | <i>o</i> -hydroxyphenylacetic acid                                                 | Root                 | Bouillant <i>et al.</i> (1994)                                  |
| 71 | Oryxalexins (A, B, C, D, E và F)                                                   | Whole plant          | Kong <i>et al.</i> (2002b)                                      |
|    |                                                                                    | Whole plant          | Kato <i>et al.</i> , (1977, 1995)                               |
| 72 | <i>p</i> -coumaric acid                                                            | Decomposed husk      | Chou and Lin (1976)                                             |
|    |                                                                                    | Leaf and stem        | Chou and Chiou (1979)                                           |
|    |                                                                                    | Rice soil            | Rimando <i>et al.</i> (2001)                                    |
|    |                                                                                    | Root                 | Seal <i>et al.</i> (2004a)                                      |
| 73 | Phenolic aldehyde                                                                  | Root                 | Kong <i>et al.</i> (2004a)                                      |
| 74 | Phenolic acids                                                                     | Root                 | Kuwatsuka and Shindo<br>(1973)                                  |
| 75 | <i>p</i> -hydroxybenzoic acid                                                      | Leaf and stem        | Chou <i>et al.</i> (1991)                                       |
|    |                                                                                    | Rice soil            | Olofsdotter <i>et al.</i> (2002b)                               |
|    |                                                                                    | Root                 | Seal <i>et al.</i> (2004a)                                      |
| 76 | Phytocassanes (A, B, C và D)                                                       | Whole plant          | Koga <i>et al.</i> (1995)                                       |
| 77 | Protocatechuic acid                                                                | Husk                 | Kuwatsuka and Shindo<br>(1973)                                  |
|    |                                                                                    | Leaf and husk        | Chou <i>et al.</i> (1991)                                       |
| 78 | <i>p</i> -Salicylic acid                                                           | Decomposed husk      | Chou and Lin (1976)                                             |
| 79 | Resorcinols                                                                        | Root                 | Bouillant <i>et al.</i> (1994)                                  |
| 80 | Salicylic acid                                                                     | Husk                 | Kuwatsuka and Shindo<br>(1973)                                  |
|    |                                                                                    | Root                 | Seal <i>et al.</i> (2004a)                                      |
| 81 | Sinapic acid                                                                       | Husk                 | Kuwatsuka and Shindo<br>(1973)                                  |
| 82 | Stearic acid                                                                       | Rice soil            | Mattice <i>et al.</i> (1998)                                    |

|    |                                                                                                                       |                 |                                |
|----|-----------------------------------------------------------------------------------------------------------------------|-----------------|--------------------------------|
| 83 | Stigmastanols (-3 $\beta$ - <i>p</i> -glyceroydihydrocoumaroate and -3 $\beta$ - <i>p</i> -butanoyd-ihydrocoumaroate) | Stem            | Chung <i>et al.</i> (2006a)    |
| 84 | Syringic acid                                                                                                         | Husk            | Kuwatsuka and Shindo (1973)    |
|    |                                                                                                                       | Rice soil       | Chou and Chiou (1979)          |
|    |                                                                                                                       | Decomposed husk | Chou <i>et al.</i> (1977)      |
|    |                                                                                                                       | Root            | Seal <i>et al.</i> (2004a)     |
| 85 | <i>t</i> -Coumaric acid                                                                                               | Root            | Seal <i>et al.</i> (2004a)     |
|    |                                                                                                                       | Husk            | Kuwatsuka and Shindo (1973)    |
| 86 | Tetradecanoic acid                                                                                                    | Root            | Mattice <i>et al.</i> (1998)   |
| 87 | <i>t</i> -Ferulic acid                                                                                                | Root            | Seal <i>et al.</i> (2004a)     |
|    |                                                                                                                       | Decomposed husk | Chou and Lin (1976)            |
| 88 | <i>trans</i> -Ferulic acid                                                                                            | Whole plant     | Song <i>et al.</i> (2004)      |
| 89 | Valeric acid                                                                                                          | Root            | Mattice <i>et al.</i> (1998)   |
|    |                                                                                                                       | Decomposed husk | Chou and Lin (1976)            |
|    |                                                                                                                       | Rice soil       | Mattice <i>et al.</i> (1998)   |
|    |                                                                                                                       | Root            | Seal <i>et al.</i> (2004a)     |
| 90 | $\beta$ -resorcylic acid                                                                                              | Husk and root   | Kuwatsuka and Shindo (1973)    |
| 91 | $\beta$ -sitosterol-3-O- $\beta$ -D-glucoside                                                                         | Root            | Bouillant <i>et al.</i> (1994) |

**Table S2.** Allelochemicals\* having effects on controlling/ stimulating pests detected in 9 OM rice cultivars by XCMS online in pair-wise job mode

| CHEMICALS IN OM 4498 |                                            |        |                        |
|----------------------|--------------------------------------------|--------|------------------------|
| No.                  | NAME                                       | ADDUCT | METLIN ID              |
| 1.                   | (R)(-)-Allantoin                           | M+H    | <a href="#">63395</a>  |
| 2.                   | (S)(+)-Allantoin                           | M+H    | <a href="#">63392</a>  |
| 3.                   | 2-(Acetyloxy)-3,5-dichlorobenzoic acid     | M+H    | <a href="#">861630</a> |
| 4.                   | 2,4-Dihydroxybenzoic acid                  | M-H    | <a href="#">283902</a> |
| 5.                   | 2,5-Bis(trifluoromethyl)hydrocinnamic acid | M+H    | <a href="#">492329</a> |
| 6.                   | 2-amino-3,5-dihydroxybenzoic acid          | M+H    | <a href="#">330220</a> |
| 7.                   | 2-Ethyl-6-hydroxybenzoic acid              | M+H    | <a href="#">276962</a> |
| 8.                   | 2-Hydroxy-6-methoxybenzoic acid            | M+H    | <a href="#">374393</a> |
| 9.                   | 3,4-Dihydroxybenzoic acid                  | M-H    | <a href="#">267460</a> |
| 10.                  | 3,4-Dihydroxyphenylacetic acid             | M+H    | <a href="#">383653</a> |
| 11.                  | 3',5,7-Trihydroxy-4',8-dimethoxyisoflavone | M+H    | <a href="#">302623</a> |

|     |                                                                    |                      |                        |
|-----|--------------------------------------------------------------------|----------------------|------------------------|
| 12. | 3,5-Bis(trifluoromethyl)hydrocinnamic acid                         | M+H                  | <a href="#">419911</a> |
| 13. | 3,5-Di-tert-butyl-4-hydroxycinnamic acid, (E)-                     | M-H                  | <a href="#">522176</a> |
| 14. | 3,5-Di-tert-butyl-4-hydroxyhydrocinnamic acid                      | M-H                  | <a href="#">361036</a> |
| 15. | 3-Ethoxy-4-hydroxybenzoic acid                                     | M+H                  | <a href="#">288553</a> |
| 16. | 3-ethyl-2-hydroxybenzoic acid                                      | M+H                  | <a href="#">300561</a> |
| 17. | 3-Hydroxybenzoic acid                                              | M-H                  | <a href="#">269175</a> |
| 18. | 3-Nitro-4-(piperidin-1-yl)cinnamic acid                            | M-H                  | <a href="#">442253</a> |
| 19. | 4-(Dichloroacetyl)-3-hydroxybenzoic acid                           | M+H                  | <a href="#">940137</a> |
| 20. | 4,4'-[Propane-1,3-diylbis(oxy)]bis(2-hydroxybenzoic acid)          | M+H-H <sub>2</sub> O | <a href="#">893932</a> |
| 21. | 4-[(3,7-Dimethyloct-6-en-1-yl)oxy]benzoic acid                     | M-H                  | <a href="#">650690</a> |
| 22. | 4-amino-2,6-dihydroxybenzoic acid                                  | M+H                  | <a href="#">534515</a> |
| 23. | 4-Hydroxybenzoic acid                                              | M-H                  | <a href="#">287667</a> |
| 24. | 4-Methoxy-(2E)-cinnamic acid                                       | M+H                  | <a href="#">313925</a> |
| 25. | 4-Pentadecylsalicylic acid                                         | M+NH <sub>4</sub>    | <a href="#">485437</a> |
| 26. | 5a,6a-Epoxy-7E-megastigmene-3a,9e-diol 3-glucoside                 | M+Na                 | <a href="#">87854</a>  |
| 27. | 5a,6a-Epoxy-7E-megastigmene-3b,9e-diol 9-glucoside                 | M+Na                 | <a href="#">93030</a>  |
| 28. | 5-Amino-2,4-dihydroxybenzoic acid                                  | M+H                  | <a href="#">288841</a> |
| 29. | 6-n-Tridecylsalicylic acid                                         | M+H                  | <a href="#">449737</a> |
| 30. | 6-pentadecyl Salicylic Acid                                        | M+NH <sub>4</sub>    | <a href="#">45469</a>  |
| 31. | 7-Oxostigmasterol                                                  | M+H                  | <a href="#">86666</a>  |
| 32. | 9,13-Dihydroxy-4-megastigmen-3-one 9-glucoside                     | M+Na                 | <a href="#">91463</a>  |
| 33. | Allantoic acid                                                     | M+H-H <sub>2</sub> O | <a href="#">343</a>    |
| 34. | Allantoin                                                          | M+H                  | <a href="#">265134</a> |
| 35. | Allantoin                                                          | M+H                  | <a href="#">89</a>     |
| 36. | Benzoic acid, 2-(allyloxy)-3,5-dipropyl-, methyl ester             | M-H                  | <a href="#">378753</a> |
| 37. | Benzoic acid, 2,2'-[1,4-phenylenebis(carbonylimino)]bis[5-hydroxy- | M+H                  | <a href="#">493792</a> |
| 38. | Benzoic acid, 2,4,6-trihydroxy-                                    | M+NH <sub>4</sub>    | <a href="#">333307</a> |
| 39. | Benzoic acid, 2,4-dihydroxy-3-methyl-                              | M+H                  | <a href="#">350080</a> |
| 40. | Benzoic acid, 2,4-dihydroxy-3-methyl-, methyl ester                | M+H                  | <a href="#">365361</a> |
| 41. | Benzoic acid, 2,4-dihydroxy-6-methyl-, methyl ester                | M+H                  | <a href="#">347669</a> |
| 42. | Benzoic acid, 2,4-dimethoxy-                                       | M+H                  | <a href="#">333768</a> |
| 43. | Benzoic acid, 2,5-dihydroxy-                                       | M-H                  | <a href="#">337551</a> |
| 44. | Benzoic acid, 2,6-dichloro-4-hydroxy-3,5-dimethoxy-                | M+H-H <sub>2</sub> O | <a href="#">450757</a> |
| 45. | Benzoic acid, 2-[(carboxymethyl)amino]-, monosodium salt           | M+H                  | <a href="#">374048</a> |

|     |                                                                                      |                      |                        |
|-----|--------------------------------------------------------------------------------------|----------------------|------------------------|
| 46. | Benzoic acid, 2-decyl-6-hydroxy-                                                     | M-H                  | <a href="#">587378</a> |
| 47. | Benzoic acid, 2-hydroxy-, 2-propenyl ester                                           | M+H                  | <a href="#">355726</a> |
| 48. | Benzoic acid, 2-hydroxy-, compd. with 3-[(2S)-1-methyl-2-pyrrolidinyl]pyridine (1:1) | M-H                  | <a href="#">386004</a> |
| 49. | Benzoic acid, 2-hydroxy-5-methoxy-                                                   | M+H                  | <a href="#">346384</a> |
| 50. | Benzoic acid, 3-(acetyloxy)-4-methoxy-                                               | M-H                  | <a href="#">322689</a> |
| 51. | Benzoic acid, 3,4-dimethoxy-                                                         | M+H                  | <a href="#">333952</a> |
| 52. | Benzoic acid, 3,5-bis(1,1-dimethylethyl)-4-hydroxy-, ethyl ester                     | M-H                  | <a href="#">343827</a> |
| 53. | Benzoic acid, 3,5-dihydroxy-                                                         | M-H                  | <a href="#">334323</a> |
| 54. | Benzoic acid, 3,5-dihydroxy-, methyl ester                                           | M+H                  | <a href="#">345179</a> |
| 55. | Benzoic acid, 3,5-dimethoxy-                                                         | M+H                  | <a href="#">342868</a> |
| 56. | Benzoic acid, 3,5-dipropyl-4-((2-methylallyl)oxy)-                                   | M-H                  | <a href="#">378740</a> |
| 57. | Benzoic acid, 3,5-dipropyl-4-ethoxy-, ethyl ester                                    | M-H                  | <a href="#">388040</a> |
| 58. | Benzoic acid, 4-(acetyloxy)-3-methoxy-                                               | M-H                  | <a href="#">398467</a> |
| 59. | Benzoic acid, 4-(allyloxy)-3,5-dipropyl-, methyl ester                               | M-H                  | <a href="#">387743</a> |
| 60. | Benzoic acid, p-hydroxy-, decyl ester                                                | M-H                  | <a href="#">371436</a> |
| 61. | beta-Ionone                                                                          | M+H-H <sub>2</sub> O | <a href="#">269858</a> |
| 62. | Caffeic acid 3-O-glucuronide                                                         | M+NH <sub>4</sub>    | <a href="#">96063</a>  |
| 63. | Caffeic acid 3-sulfate                                                               | M-H                  | <a href="#">96064</a>  |
| 64. | Caffeic acid 4-O-glucuronide                                                         | M+NH <sub>4</sub>    | <a href="#">96065</a>  |
| 65. | Caffeic acid 4-sulfate                                                               | M-H                  | <a href="#">96066</a>  |
| 66. | Carbonic acid, ethyl ester, ester with salicylic acid                                | M-H                  | <a href="#">426988</a> |
| 67. | Cinnamic acid                                                                        | M+H                  | <a href="#">386653</a> |
| 68. | Flavone, 4',7-dimethoxy-3,3',5-trihydroxy-                                           | M+H                  | <a href="#">274757</a> |
| 69. | Flavone, 5,7-dimethoxy-3,3',4'-trihydroxy-                                           | M+H                  | <a href="#">421136</a> |
| 70. | Glucosyringic acid                                                                   | M-H                  | <a href="#">473754</a> |
| 71. | Homovanillic acid                                                                    | M+H                  | <a href="#">336519</a> |
| 72. | Isovanillic acid                                                                     | M+H                  | <a href="#">349613</a> |
| 73. | Phenyllactic acid                                                                    | M+H                  | <a href="#">34529</a>  |
| 74. | p-Hydroxycinnamic acid                                                               | M+H-H <sub>2</sub> O | <a href="#">354145</a> |
| 75. | Salicylic acid                                                                       | M-H                  | <a href="#">287200</a> |
| 76. | Salicylic acid beta-D-glucoside                                                      | M+Na                 | <a href="#">95685</a>  |
| 77. | Salicylic acid, (2-(2-(p-chlorophenoxy)-2,2-dimethylacetoxy)ethyl)ester              | M-H                  | <a href="#">268358</a> |
| 78. | Salicylic acid, 4-(2-(diethylamino)acetamido)-, hexyl ester, hydrochloride           | M+H                  | <a href="#">427261</a> |
| 79. | Salicylic acid, 4-(3-(benzylamino)propionamido)-, ethyl ester, monohydrochloride     | M+Na                 | <a href="#">425714</a> |

|     |                                                                                                 |       |                        |
|-----|-------------------------------------------------------------------------------------------------|-------|------------------------|
| 80. | Salicylic acid, 4-(3-(diethylamino)propionamido)-, pentyl ester, hydrochloride                  | M+H   | <a href="#">425741</a> |
| 81. | Salicylic acid, 4-(3-(isopropylamino)propionamido)-, hexyl ester, hydrochloride                 | M+H   | <a href="#">425758</a> |
| 82. | Salicylic acid, 4-(3-piperidinopropionamido)-, hexyl ester, hydrochloride                       | M-H   | <a href="#">425760</a> |
| 83. | Salicylic acid, 4-(N(sup 2)-(1,3-dihydroxy-2-(p-nitrophenyl)-2-propyl)oxamido)-, D-threo-, (-)- | M+NH4 | <a href="#">395938</a> |
| 84. | Salicylic acid, 4-(N(sup 2)-(1,3-dihydroxy-2-(p-nitrophenyl)-2-propyl)oxamido)-, L-threo-, (+)- | M+NH4 | <a href="#">395941</a> |
| 85. | Salicylic acid, 4-amino-, acetate, sodium salt                                                  | M+H   | <a href="#">392378</a> |
| 86. | Salicylic acid, dichloroacetate                                                                 | M+H   | <a href="#">498655</a> |
| 87. | Salicylic acid, p-butylamino-, 1-ethyl-4-piperidyl ester, hydrochloride                         | M+H   | <a href="#">509254</a> |
| 88. | Vanillic acid                                                                                   | M+H   | <a href="#">335542</a> |



| CHEMICALS IN OM 2395 |                                                                                  |         |                        |
|----------------------|----------------------------------------------------------------------------------|---------|------------------------|
| No.                  | NAME                                                                             | ADDUCT  | METLIN ID              |
| 1.                   | (R)(-)-Allantoin                                                                 | M+H     | <a href="#">63395</a>  |
| 2.                   | (S)(+)-Allantoin                                                                 | M+H     | <a href="#">63392</a>  |
| 3.                   | 2,2'-(Decane-1,10-diyl)diazanediylbis(phenylacetic acid)--hydrogen bromide (1/1) | M-H     | <a href="#">841096</a> |
| 4.                   | 2,3,5,6-Tetrafluoro-4-hydroxybenzoic acid--water (1/1)                           | M-H     | <a href="#">699091</a> |
| 5.                   | 2-Ethyl-6-hydroxybenzoic acid                                                    | M+H     | <a href="#">276962</a> |
| 6.                   | 3-Cyclopentyl-5-tert-butyl-4-hydroxybenzoic acid                                 | M+H-H2O | <a href="#">519898</a> |
| 7.                   | 3-Ethoxy-4-hydroxybenzoic acid                                                   | M+H-H2O | <a href="#">288553</a> |
| 8.                   | 3-ethyl-2-hydroxybenzoic acid                                                    | M+H     | <a href="#">300561</a> |
| 9.                   | 3-Hexaprenyl-4,5-Dihydroxybenzoic acid                                           | M-H     | <a href="#">5976</a>   |
| 10.                  | 3-Hydroxybenzoic acid                                                            | M-H     | <a href="#">269175</a> |
| 11.                  | 4-(2-Hydroxy-3-methoxy-propoxy)-benzoic acid                                     | M+H-H2O | <a href="#">580872</a> |
| 12.                  | 4,4'-[Propane-1,3-diylbis(oxy)]bis(2-hydroxybenzoic acid)                        | M+H-H2O | <a href="#">893932</a> |
| 13.                  | 4-Hydroxybenzoic acid                                                            | M+H-H2O | <a href="#">287667</a> |
| 14.                  | 4-Methoxy-(2E)-cinnamic acid                                                     | M+H-H2O | <a href="#">313925</a> |
| 15.                  | 7-Oxostigmasterol                                                                | M+H     | <a href="#">86666</a>  |
| 16.                  | 8-Quinolinol salicylic acid (1:1)                                                | M-H     | <a href="#">311563</a> |
| 17.                  | Allantoic acid                                                                   | M+H-H2O | <a href="#">343</a>    |
| 18.                  | Allantoin                                                                        | M+H     | <a href="#">265134</a> |
| 19.                  | Allantoin                                                                        | M+H     | <a href="#">89</a>     |
| 20.                  | Benzoic acid, 2-(allyloxy)-3,5-dipropyl-                                         | M+H-H2O | <a href="#">378756</a> |
| 21.                  | Benzoic acid, 2-(allyloxy)-3,5-dipropyl-, methyl ester                           | M-H     | <a href="#">378753</a> |
| 22.                  | Benzoic acid, 2,4-dihydroxy-3-methyl-, methyl ester                              | M+H-H2O | <a href="#">365361</a> |
| 23.                  | Benzoic acid, 2,4-dihydroxy-6-methyl-, methyl ester                              | M+H-H2O | <a href="#">347669</a> |
| 24.                  | Benzoic acid, 2,4-dimethoxy-                                                     | M+H-H2O | <a href="#">333768</a> |
| 25.                  | Benzoic acid, 2-[(1,3-benzodioxol-5-ylmethylene)amino]-, methyl ester            | M-H     | <a href="#">378871</a> |
| 26.                  | Benzoic acid, 2-hydroxy-, 2-propenyl ester                                       | M+H-H2O | <a href="#">355726</a> |
| 27.                  | Benzoic acid, 2-hydroxy-3,4-dimethyl-                                            | M+H     | <a href="#">311363</a> |
| 28.                  | Benzoic acid, 2-hydroxy-6-(8-pentadecenyl)-                                      | M+H     | <a href="#">309832</a> |
| 29.                  | Benzoic acid, 3-(acetyloxy)-4-methoxy-                                           | M-H     | <a href="#">322689</a> |
| 30.                  | Benzoic acid, 3,4,5-trihydroxy-, 1,1-dimethylethyl ester                         | M+H-H2O | <a href="#">591452</a> |

|     |                                                                         |                      |                        |
|-----|-------------------------------------------------------------------------|----------------------|------------------------|
| 31. | Benzoic acid, 3,4,5-trimethoxy-, methyl ester                           | M+H-H <sub>2</sub> O | <a href="#">344660</a> |
| 32. | Benzoic acid, 3,4-dimethoxy-                                            | M+H-H <sub>2</sub> O | <a href="#">333952</a> |
| 33. | Benzoic acid, 3,5-dimethoxy-                                            | M+H-H <sub>2</sub> O | <a href="#">342868</a> |
| 34. | Benzoic acid, 3,5-dimethoxy-4-hydroxy-, ethyl ester                     | M+H-H <sub>2</sub> O | <a href="#">502297</a> |
| 35. | Benzoic acid, 3,5-dipropyl-4-((2-methylallyl)oxy)-                      | M-H                  | <a href="#">378740</a> |
| 36. | Benzoic acid, 4-(8-nonenyloxy)-                                         | M+H-H <sub>2</sub> O | <a href="#">485399</a> |
| 37. | Benzoic acid, 4-(9-acridinylamino)-3-methyl-                            | M-H                  | <a href="#">351647</a> |
| 38. | Benzoic acid, 4-(acetyloxy)-3-methoxy-                                  | M-H                  | <a href="#">398467</a> |
| 39. | Benzoic acid, 4-(allyloxy)-3,5-diisopropyl-                             | M+H-H <sub>2</sub> O | <a href="#">378733</a> |
| 40. | Benzoic acid, 4-(allyloxy)-3,5-dipropyl-                                | M+H-H <sub>2</sub> O | <a href="#">387734</a> |
| 41. | Benzoic acid, 4-(allyloxy)-3,5-dipropyl-, methyl ester                  | M-H                  | <a href="#">387743</a> |
| 42. | Benzoic acid, acetylmethyl ester                                        | M+H-H <sub>2</sub> O | <a href="#">358947</a> |
| 43. | Benzoic acid--[(2R,4R)-2-propyl-1,3-dithiolan-4-yl]methanol (1/1)       | M-H                  | <a href="#">955826</a> |
| 44. | Benzoic acid--[(2R,4S)-2-propyl-1,3-dithiolan-4-yl]methanol (1/1)       | M-H                  | <a href="#">955955</a> |
| 45. | Benzoic acid--[1~1~,2~1~:2~3~,3~1~-terphenyl]-1~4~,3~4~-diol (2/1)      | M-H                  | <a href="#">895320</a> |
| 46. | Benzoic acid--4,8,11,11-tetramethylbicyclo[7.2.0]undecan-2-ol (1/1)     | M+H                  | <a href="#">934910</a> |
| 47. | Carbonic acid, ethyl ester, ester with salicylic acid                   | M-H                  | <a href="#">426988</a> |
| 48. | Cinnamic acid                                                           | M+H                  | <a href="#">386653</a> |
| 49. | Dihydro-beta-ionone                                                     | M+Na                 | <a href="#">317358</a> |
| 50. | Dihydroferulic acid 4-O-glucuronide                                     | M-H                  | <a href="#">96081</a>  |
| 51. | E-Cinnamic acid                                                         | M+H                  | <a href="#">273681</a> |
| 52. | Homovanillic acid                                                       | M+H-H <sub>2</sub> O | <a href="#">336519</a> |
| 53. | Hydrocinnamic acid, p-((2-chloroethyl)(2-fluoroethyl)amino)-            | M+NH <sub>4</sub>    | <a href="#">504861</a> |
| 54. | o-Methoxyhydrocinnamic acid                                             | M+H-H <sub>2</sub> O | <a href="#">24105</a>  |
| 55. | Phenylacetic acid                                                       | M+H-H <sub>2</sub> O | <a href="#">269393</a> |
| 56. | Phenyllactic acid                                                       | M+H                  | <a href="#">34529</a>  |
| 57. | p-Hydroxycinnamic acid                                                  | M+H-H <sub>2</sub> O | <a href="#">354145</a> |
| 58. | Salicylic acid                                                          | M+H-H <sub>2</sub> O | <a href="#">287200</a> |
| 59. | Salicylic acid beta-D-glucoside                                         | M-H                  | <a href="#">95685</a>  |
| 60. | Salicylic acid monoethanolamine                                         | M+H-H <sub>2</sub> O | <a href="#">319803</a> |
| 61. | Salicylic acid, 3,5-diallyl-, methyl ester                              | M+H                  | <a href="#">519215</a> |
| 62. | Salicylic acid, 4-(2-piperidinoacetamido)-, butyl ester, hydrochloride  | M+H-H <sub>2</sub> O | <a href="#">425724</a> |
| 63. | Salicylic acid, 4-(2-piperidinoacetamido)-, methyl ester, hydrochloride | M-H                  | <a href="#">426167</a> |

|     |                                                                                      |                      |                        |
|-----|--------------------------------------------------------------------------------------|----------------------|------------------------|
| 64. | Salicylic acid, 4-(3-(cyclohexylamino)propionamido)-, ethyl ester, monohydrochloride | M+H-H <sub>2</sub> O | <a href="#">425715</a> |
| 65. | Salicylic acid, 4-(3-piperidinopropionamido)-, hexyl ester, hydrochloride            | M-H                  | <a href="#">425760</a> |
| 66. | Salicylic acid, 4-(3-piperidinopropionamido)-, propyl ester, hydrochloride           | M+H-H <sub>2</sub> O | <a href="#">425719</a> |
| 67. | Salicylic acid, amino-, 2-hydroxyethyl ester                                         | M+H                  | <a href="#">428715</a> |

| CHEMICALS IN OM 3536 |                                                                                                                |                      |                        |
|----------------------|----------------------------------------------------------------------------------------------------------------|----------------------|------------------------|
| No.                  | NAME                                                                                                           | ADDUCT               | METLIN ID              |
| 1.                   | (3,5-Difluoro-4-methoxyphenyl)acetic acid                                                                      | M-H                  | <a href="#">273869</a> |
| 2.                   | (R)(-)-Allantoin                                                                                               | M+H                  | <a href="#">63395</a>  |
| 3.                   | (S)(+)-Allantoin                                                                                               | M+H                  | <a href="#">63392</a>  |
| 4.                   | 2-(4-methylnaphthalene-1-carbonyl)benzoic acid                                                                 | M-H                  | <a href="#">301669</a> |
| 5.                   | 2-(difluoromethoxy)phenylacetic acid                                                                           | M-H                  | <a href="#">457312</a> |
| 6.                   | 2,4-Dihydroxybenzoic acid                                                                                      | M+H-H <sub>2</sub> O | <a href="#">283902</a> |
| 7.                   | 2-[(2-chloro-4-methylbenzoyl)carbamothioylamino]-5-iodobenzoic acid                                            | M-H                  | <a href="#">498198</a> |
| 8.                   | 2-[3-(difluoromethoxy)phenyl]acetic Acid                                                                       | M-H                  | <a href="#">457314</a> |
| 9.                   | 3,4-Dihydroxybenzoic acid                                                                                      | M+H-H <sub>2</sub> O | <a href="#">267460</a> |
| 10.                  | 3,4-Dihydroxyphenylacetic acid                                                                                 | M-H                  | <a href="#">383653</a> |
| 11.                  | 3-[(2-chloro-5-iodobenzoyl)carbamothioylamino]-4-methylbenzoic acid                                            | M-H                  | <a href="#">428446</a> |
| 12.                  | 3-[(E)-({4-[Bis(2-chloroethyl)amino]-3-methoxyphenyl}methylidene)amino]benzoic acid--hydrogen chloride (1/1)   | M-H                  | <a href="#">786623</a> |
| 13.                  | 3-Amino-4-ethoxybenzoic acid                                                                                   | M-H                  | <a href="#">269132</a> |
| 14.                  | 4-(Difluoromethoxy)phenylacetic acid                                                                           | M-                   |                        |
| 15.                  | 4-(Trifluoromethyl)hydrocinnamic acid                                                                          | M+H-H <sub>2</sub> O | <a href="#">482875</a> |
| 16.                  | 4-[(E)-({4-[Bis(2-chloroethyl)amino]-3-methoxyphenyl}methylidene)amino]benzoic acid--hydrogen chloride (1/1)   | M-H                  | <a href="#">786477</a> |
| 17.                  | 4-Methoxy-3-(morpholin-4-yl)benzoic acid                                                                       | M-H                  | <a href="#">269129</a> |
| 18.                  | 5-Methoxysalicylic acid                                                                                        | M-H                  | <a href="#">4164</a>   |
| 19.                  | 6-Methyl coumarin                                                                                              | M+H                  | <a href="#">285280</a> |
| 20.                  | Allantoic acid                                                                                                 | M+H-H <sub>2</sub> O | <a href="#">343</a>    |
| 21.                  | Allantoin                                                                                                      | M+H                  | <a href="#">265134</a> |
| 22.                  | Allantoin                                                                                                      | M+H                  | <a href="#">89</a>     |
| 23.                  | Benzoic acid                                                                                                   | M+H                  | <a href="#">265216</a> |
| 24.                  | Benzoic acid, 2-(((6,8-dibromo-3,4-dihydro-2-(2-methoxyphenyl)-4-oxo-2-quinazoliny)methyl)sulfonyl)-           | M+NH <sub>4</sub>    | <a href="#">402216</a> |
| 25.                  | Benzoic acid, 2-((7-chloro-4-quinoliny)amino)-, 2-oxo-2-((1-(2-oxo-2-phenylethyl)-4-piperidinyloxy)ethyl ester | M-H                  | <a href="#">515902</a> |
| 26.                  | Benzoic acid, 2-(2,3-dihydro-5-methyl-2-(3-(4-(4-methyl-2-pyridiny)l)-1-piperaziny)propyl)-                    | M-H                  | <a href="#">396678</a> |

|     |                                                                                                                          |                      |                        |
|-----|--------------------------------------------------------------------------------------------------------------------------|----------------------|------------------------|
|     | 3-oxo-1H-pyrazol-1-yl)-, methyl ester, trihydrochloride                                                                  |                      |                        |
| 27. | Benzoic acid, 2-(5-(2-chloro-4-(trifluoromethyl)phenoxy)-2-nitrophenyl)hydrazide                                         | M-H                  | <a href="#">391715</a> |
| 28. | Benzoic acid, 2-(allyloxy)-3,5-dipropyl-, methyl ester                                                                   | M-H                  | <a href="#">378753</a> |
| 29. | Benzoic acid, 2,4-dihydroxy-3-methyl-                                                                                    | M-H                  | <a href="#">350080</a> |
| 30. | Benzoic acid, 2,5-dihydroxy-                                                                                             | M+H-H <sub>2</sub> O | <a href="#">337551</a> |
| 31. | Benzoic acid, 2,6-diacetamido-                                                                                           | M-H                  | <a href="#">399043</a> |
| 32. | Benzoic acid, 2-hydroxy-, compd. with 3-[(2S)-1-methyl-2-pyrrolidinyl]pyridine (1:1)                                     | M-H                  | <a href="#">386004</a> |
| 33. | Benzoic acid, 2-hydroxy-5-methoxy-                                                                                       | M-H                  | <a href="#">346384</a> |
| 34. | Benzoic acid, 3,3'-(2,2,2-trichloroethylidene)bis[6-hydroxy-                                                             | M-H                  | <a href="#">416933</a> |
| 35. | Benzoic acid, 3,4,5-trimethoxy-, 4-(4-phenyl-1-piperazinyl)butyl ester, dihydrochloride                                  | M-H                  | <a href="#">316390</a> |
| 36. | Benzoic acid, 3,4,5-tris[[1,1-dimethylethoxy)carbonyl]oxy]-                                                              | M-H                  | <a href="#">619755</a> |
| 37. | Benzoic acid, 3,5-bis(acetylamino)-                                                                                      | M-H                  | <a href="#">354618</a> |
| 38. | Benzoic acid, 3,5-dihydroxy-                                                                                             | M+H-H <sub>2</sub> O | <a href="#">334323</a> |
| 39. | Benzoic acid, 3,5-dihydroxy-, methyl ester                                                                               | M-H                  | <a href="#">345179</a> |
| 40. | Benzoic acid, 3,5-dipropyl-4-((2-methylallyl)oxy)-                                                                       | M-H                  | <a href="#">378740</a> |
| 41. | Benzoic acid, 3-[3-[(2-aminoethyl)(5-isoquinolylsulfonyl)amino]propyl]-                                                  | M-H                  | <a href="#">590150</a> |
| 42. | Benzoic acid, 3-amino-2,5-dimethyl-                                                                                      | M-H                  | <a href="#">324699</a> |
| 43. | Benzoic acid, 4-(((4-fluorophenoxy)acetyl)amino)-, 2-(diethylamino)ethyl ester                                           | M-H                  | <a href="#">288765</a> |
| 44. | Benzoic acid, 4-((aminoiminomethyl)amino)-, 4-(methylthio)phenyl ester                                                   | M-H                  | <a href="#">509829</a> |
| 45. | Benzoic acid, 4-(1-carboxycyclopropyl)-2,3,5-trifluoro-, 1-ethyl ester                                                   | M-H                  | <a href="#">628972</a> |
| 46. | Benzoic acid, 4-(6-(1-pyrrolidinyl)-1,2,4-triazolo(3,4-a)phthalazin-3-yl)-                                               | M+Na                 | <a href="#">516692</a> |
| 47. | Benzoic acid, 4-(allyloxy)-3,5-dipropyl-, methyl ester                                                                   | M-H                  | <a href="#">387743</a> |
| 48. | Benzoic acid, 4,4'-(1,4-dioxo-1,4-butanediyl)bis-, dimethyl ester                                                        | M-H                  | <a href="#">628482</a> |
| 49. | Benzoic acid, 4-[(5-cyano-1-ethyl-1,6-dihydro-2-hydroxy-4-methyl-6-oxo-3-pyridinyl)azo]-, 2-(2-methoxyethoxy)ethyl ester | M-H                  | <a href="#">367347</a> |

|     |                                                                                   |         |                        |
|-----|-----------------------------------------------------------------------------------|---------|------------------------|
| 50. | Benzoic acid, 4-chloro-2-((2-methylphenyl)amino)-, 2-(aminothioxomethyl)hydrazide | M-H     | <a href="#">448007</a> |
| 51. | Benzoic acid, 4-chloro-2-((3-methylphenyl)amino)-, 2-(aminothioxomethyl)hydrazide | M-H     | <a href="#">448009</a> |
| 52. | Benzoic acid, 4-chloro-2-((4-methylphenyl)amino)-, 2-(aminothioxomethyl)hydrazide | M-H     | <a href="#">448011</a> |
| 53. | Benzoic acid, 4-nitro-, pentyl ester                                              | M-H     | <a href="#">358069</a> |
| 54. | Benzoic acid--[(2R,4R)-2-propyl-1,3-dithiolan-4-yl]methanol (1/1)                 | M-H     | <a href="#">955826</a> |
| 55. | Benzoic acid--[(2R,4S)-2-propyl-1,3-dithiolan-4-yl]methanol (1/1)                 | M-H     | <a href="#">955955</a> |
| 56. | Benzoic acid-4-13C                                                                | M+H     | <a href="#">595330</a> |
| 57. | Benzoic acid, 4-iodo-, ethylester                                                 | M-H     | <a href="#">323640</a> |
| 58. | beta-Ionone                                                                       | M+H     | <a href="#">269858</a> |
| 59. | Caffeic acid 3-O-glucuronide                                                      | M+NH4   | <a href="#">96063</a>  |
| 60. | Caffeic acid 4-O-glucuronide                                                      | M+NH4   | <a href="#">96065</a>  |
| 61. | Cinnamic acid                                                                     | M+H     | <a href="#">386653</a> |
| 62. | Coumarin                                                                          | M+H     | <a href="#">265421</a> |
| 63. | Coumarin, 3-amino-4-morpholino-                                                   | M-H     | <a href="#">317019</a> |
| 64. | Coumarin, 3-chloro-7-hydroxy-4-methyl-, bis(4-chlorobutyl)phosphate               | M-H     | <a href="#">430280</a> |
| 65. | Coumarin, 3-ethyl-                                                                | M+H     | <a href="#">360342</a> |
| 66. | E-Cinnamic acid                                                                   | M+H     | <a href="#">273681</a> |
| 67. | Glucosyringic acid                                                                | M+Na    | <a href="#">473754</a> |
| 68. | Homovanillic acid                                                                 | M+H     | <a href="#">336519</a> |
| 69. | Isovanillic acid                                                                  | M-H     | <a href="#">349613</a> |
| 70. | p-Hydroxycinnamic acid                                                            | M+H-H2O | <a href="#">354145</a> |
| 71. | Salicylic acid beta-D-glucoside                                                   | M-H     | <a href="#">95685</a>  |
| 72. | Salicylic acid, 3,5-diallyl-, methyl ester                                        | M+H     | <a href="#">519215</a> |
| 73. | Salicylic acid, 4-(3-piperidinopropionamido)-, hexyl ester, hydrochloride         | M-H     | <a href="#">425760</a> |
| 74. | Vanillic acid                                                                     | M-H     | <a href="#">335542</a> |

| CHEMICALS IN OM 5930 |                                                                                              |         |                        |
|----------------------|----------------------------------------------------------------------------------------------|---------|------------------------|
| No.                  | NAME                                                                                         | ADDUCT  | METLIN ID              |
| 1.                   | 2,3,4-Trihydroxybenzoic acid                                                                 | M+NH4   | <a href="#">325930</a> |
| 2.                   | 2,4,5-Trihydroxybenzoic acid                                                                 | M+NH4   | <a href="#">326013</a> |
| 3.                   | 2,5-Bis(trifluoromethyl)hydrocinnamic acid                                                   | M+H     | <a href="#">492329</a> |
| 4.                   | 2-Ethyl-6-hydroxybenzoic acid                                                                | M+H     | <a href="#">276962</a> |
| 5.                   | 3,4-Dihydrocoumarin                                                                          | M+H     | <a href="#">265621</a> |
| 6.                   | 3,4-Dihydroxyphenylacetic acid                                                               | M+H     | <a href="#">383653</a> |
| 7.                   | 3,5-Bis(trifluoromethyl)hydrocinnamic acid                                                   | M+H     | <a href="#">419911</a> |
| 8.                   | 3-ethyl-2-hydroxybenzoic acid                                                                | M+H     | <a href="#">300561</a> |
| 9.                   | 3-Hydroxybenzoic acid                                                                        | M+H-H2O | <a href="#">269175</a> |
| 10.                  | 4,4'-[1,3-Phenylenebis(carbonylazanediy)]bis(2-hydroxybenzoic acid)                          | M+H     | <a href="#">671339</a> |
| 11.                  | 4,4'-[1,4-Phenylenebis(carbonylazanediy)]bis(2-hydroxybenzoic acid)                          | M+H     | <a href="#">540511</a> |
| 12.                  | 4,4'-[Hexane-1,6-diylbis(oxy)]bis(2-hydroxybenzoic acid)                                     | M+H-H2O | <a href="#">893933</a> |
| 13.                  | 4,4'-[Propane-1,3-diylbis(oxy)]bis(2-hydroxybenzoic acid)                                    | M+H-H2O | <a href="#">893932</a> |
| 14.                  | 4,5-Dimethylsalicylic acid                                                                   | M+H     | <a href="#">311360</a> |
| 15.                  | 4-[[4-[(4-carboxy-3-hydroxyphenyl)iminomethyl]phenyl]methylideneamino]-2-hydroxybenzoic acid | M+Na    | <a href="#">428018</a> |
| 16.                  | 4-Hydroxybenzoic acid                                                                        | M+H-H2O | <a href="#">287667</a> |
| 17.                  | 4-Methoxy-(2E)-cinnamic acid                                                                 | M+H     | <a href="#">313925</a> |
| 18.                  | 7-Oxostigmasterol                                                                            | M+H     | <a href="#">86666</a>  |
| 19.                  | Benzoic acid, 2-(allyloxy)-3,5-dipropyl-, methyl ester                                       | M+H     | <a href="#">378753</a> |
| 20.                  | Benzoic acid, 2,2'-[1,4-phenylenebis(carbonylimino)]bis-                                     | M+Na    | <a href="#">416785</a> |
| 21.                  | Benzoic acid, 2,2'-[1,4-phenylenebis(carbonylimino)]bis[5-hydroxy-                           | M+H     | <a href="#">493792</a> |
| 22.                  | Benzoic acid, 2,4,6-trihydroxy-                                                              | M+NH4   | <a href="#">333307</a> |
| 23.                  | Benzoic acid, 2,4-dihydroxy-3-methyl-                                                        | M+H     | <a href="#">350080</a> |
| 24.                  | Benzoic acid, 2-[(carboxymethyl)amino]-, monosodium salt                                     | M+H     | <a href="#">374048</a> |
| 25.                  | Benzoic acid, 2-hydroxy-, 2-propenyl ester                                                   | M+H     | <a href="#">355726</a> |
| 26.                  | Benzoic acid, 2-hydroxy-3,4-dimethyl-                                                        | M+H     | <a href="#">311363</a> |
| 27.                  | Benzoic acid, 2-hydroxy-5-methoxy-                                                           | M+H     | <a href="#">346384</a> |
| 28.                  | Benzoic acid, 2-hydroxy-6-(8-pentadecenyl)-                                                  | M+H     | <a href="#">309832</a> |

|     |                                                                                 |         |                        |
|-----|---------------------------------------------------------------------------------|---------|------------------------|
| 29. | Benzoic acid, 3,3'-[1,3-phenylenebis(carbonylimino)]bis-                        | M+Na    | <a href="#">364552</a> |
| 30. | Benzoic acid, 3,5-dihydroxy-, methyl ester                                      | M+H     | <a href="#">345179</a> |
| 31. | Benzoic acid, 3,5-dipropyl-4-((2-methylallyl)oxy)-                              | M+H     | <a href="#">378740</a> |
| 32. | Benzoic acid, 4-(allyloxy)-3,5-dipropyl-, methyl ester                          | M+H     | <a href="#">387743</a> |
| 33. | Benzoic acid, acetylmethyl ester                                                | M+H     | <a href="#">358947</a> |
| 34. | Benzoic acid--[(2R,4R)-2-propyl-1,3-dithiolan-4-yl]methanol (1/1)               | M+Na    | <a href="#">955826</a> |
| 35. | Benzoic acid--[(2R,4S)-2-propyl-1,3-dithiolan-4-yl]methanol (1/1)               | M+Na    | <a href="#">955955</a> |
| 36. | Benzoic acid--4,8,11,11-tetramethylbicyclo[7.2.0]undecan-2-ol (1/1)             | M+H     | <a href="#">934910</a> |
| 37. | beta-Ionone                                                                     | M+H     | <a href="#">269858</a> |
| 38. | Bis(3-nitrophenyl) methyl(phenyl)propanedioate                                  | M+H     | <a href="#">898560</a> |
| 39. | Cinnamic acid                                                                   | M+H     | <a href="#">386653</a> |
| 40. | Dihydro-beta-ionone                                                             | M+Na    | <a href="#">317358</a> |
| 41. | E-Cinnamic acid                                                                 | M+H     | <a href="#">273681</a> |
| 42. | Ergosterol peroxide                                                             | M+H-H2O | <a href="#">92736</a>  |
| 43. | Isovanillic acid                                                                | M+H     | <a href="#">349613</a> |
| 44. | Phenyllactic acid                                                               | M+H     | <a href="#">34529</a>  |
| 45. | Phenyllactic acid                                                               | M+H     | <a href="#">34529</a>  |
| 46. | p-Hydroxycinnamic acid                                                          | M+H-H2O | <a href="#">354145</a> |
| 47. | Salicylic acid                                                                  | M+H-H2O | <a href="#">287200</a> |
| 48. | Salicylic acid beta-D-glucoside                                                 | M+Na    | <a href="#">95685</a>  |
| 49. | Salicylic acid, 4-(2-(diethylamino)acetamido)-, hexyl ester, hydrochloride      | M+H     | <a href="#">427261</a> |
| 50. | Salicylic acid, 4-(3-(diethylamino)propionamido)-, pentyl ester, hydrochloride  | M+H-H2O | <a href="#">425741</a> |
| 51. | Salicylic acid, 4-(3-(isopropylamino)propionamido)-, hexyl ester, hydrochloride | M+H     | <a href="#">425758</a> |
| 52. | Salicylic acid, 4-amino-, acetate, sodium salt                                  | M+H     | <a href="#">392378</a> |
| 53. | Salicylic acid, amino-, 2-hydroxyethyl ester                                    | M+H     | <a href="#">428715</a> |
| 54. | Salicylic acid, copper salt                                                     | M+NH4   | <a href="#">451678</a> |
| 55. | Salicylic acid, methylene ester                                                 | M+H-H2  |                        |
| 56. | Salicylic acid, p-butylamino-, 1-ethyl-4-piperidyl ester, hydrochloride         | M+H     | <a href="#">509254</a> |
| 57. | Stigmasterol                                                                    | M+H-H2O | <a href="#">168</a>    |
| 58. | Vanillic acid                                                                   | M+H     | <a href="#">335542</a> |
| 59. | (R)(-)-Allantoin                                                                | M-H     | <a href="#">63395</a>  |
| 60. | (S)(+)-Allantoin                                                                | M-H     | <a href="#">63392</a>  |



|     |                                                                                                 |     |                        |
|-----|-------------------------------------------------------------------------------------------------|-----|------------------------|
| 61. | 2,4-Dihydroxybenzoic acid                                                                       | M-H | <a href="#">283902</a> |
| 62. | 3,4-Dihydroxybenzoic acid                                                                       | M-H | <a href="#">267460</a> |
| 63. | 3',5,7-Trihydroxy-4',8-dimethoxyisoflavone                                                      | M-H | <a href="#">302623</a> |
| 64. | 3,5-Di-tert-butyl-4-hydroxycinnamic acid, (E)-                                                  | M-H | <a href="#">522176</a> |
| 65. | 3-Hydroxybenzoic acid                                                                           | M-H | <a href="#">269175</a> |
| 66. | 3-Nitro-4-(piperidin-1-yl)cinnamic acid                                                         | M-H | <a href="#">442253</a> |
| 67. | 4',5,7-Trihydroxy-3,6-dimethoxyflavone                                                          | M-H | <a href="#">455671</a> |
| 68. | 4-Hydroxybenzoic acid                                                                           | M-H | <a href="#">287667</a> |
| 69. | 5,7,3'-Trihydroxy-3,4'-dimethoxyflavone 8-C-rhamnopyranoside                                    | M-H | <a href="#">51170</a>  |
| 70. | 5,7,8-Trihydroxy-3,6,4'-trimethoxy-flavone 8-isovalerate                                        | M-H | <a href="#">51717</a>  |
| 71. | Allantoin                                                                                       | M-H | <a href="#">265134</a> |
| 72. | Allantoin                                                                                       | M-H | <a href="#">89</a>     |
| 73. | Benzoic acid, 2-(allyloxy)-3,5-dipropyl-, methyl ester                                          | M-H | <a href="#">378753</a> |
| 74. | Benzoic acid, 2,5-dihydroxy-                                                                    | M-H | <a href="#">337551</a> |
| 75. | Benzoic acid, 2-hydroxy-, compd. with 3-[(2S)-1-methyl-2-pyrrolidinyl]pyridine (1:1)            | M-H | <a href="#">386004</a> |
| 76. | Benzoic acid, 3,5-dihydroxy-                                                                    | M-H | <a href="#">334323</a> |
| 77. | Benzoic acid, 3,5-dimethyl-4-propoxy-, ethyl ester                                              | M-H | <a href="#">387554</a> |
| 78. | Benzoic acid, 3,5-dipropyl-4-((2-methylallyl)oxy)-                                              | M-H | <a href="#">378740</a> |
| 79. | Benzoic acid, 4-(acetyloxy)-3-methoxy-                                                          | M-H | <a href="#">398467</a> |
| 80. | Benzoic acid, 4-(allyloxy)-3,5-dipropyl-, methyl ester                                          | M-H | <a href="#">387743</a> |
| 81. | Benzoic acid--[(2R,4R)-2-propyl-1,3-dithiolan-4-yl]methanol (1/1)                               | M-H | <a href="#">955826</a> |
| 82. | Benzoic acid--[(2R,4S)-2-propyl-1,3-dithiolan-4-yl]methanol (1/1)                               | M-H | <a href="#">955955</a> |
| 83. | Carbonic acid, ethyl ester, ester with salicylic acid                                           | M-H | <a href="#">426988</a> |
| 84. | Flavone, 5,7-dimethoxy-3,3',4'-trihydroxy-                                                      | M-H | <a href="#">421136</a> |
| 85. | Glucosyringic acid                                                                              | M-H | <a href="#">473754</a> |
| 86. | p-Hydroxycinnamic acid                                                                          | M-H | <a href="#">354145</a> |
| 87. | Salicylic acid                                                                                  | M-H | <a href="#">287200</a> |
| 88. | Salicylic acid beta-D-glucoside                                                                 | M-H | <a href="#">95685</a>  |
| 89. | Salicylic acid, 3,5-dipropyl-, methyl ester                                                     | M-H | <a href="#">378749</a> |
| 90. | Salicylic acid, 4-(N(sup 2)-(1,3-dihydroxy-2-(p-nitrophenyl)-2-propyl)oxamido)-, D-threo-, (-)- | M-H | <a href="#">395938</a> |
|     | Salicylic acid, 4-(N(sup 2)-(1,3-dihydroxy-2-(p-nitrophenyl)-2-propyl)oxamido)-, L-threo-, (+)- | M-H | <a href="#">395941</a> |

|     |                                                           |     |                        |
|-----|-----------------------------------------------------------|-----|------------------------|
| 91. | 4-hydroxybenzoic acid- 1-phenylpiperazine(1:1)            | M-H | <a href="#">547246</a> |
| 92. | Benzoic acid, 2,2'-[carbonylbis(oxy)]bis-, dimethyl ester | M-H | <a href="#">492589</a> |
| 93. | Benzoic acid, 2,2'-[carbonylbis(oxy)]bis-, dimethyl ester | M-H | <a href="#">492589</a> |
| 94. | 5,2',3'-Trihydroxy-7,8-dimethoxyflavone 3'-glucoside      | M-H | <a href="#">49717</a>  |
| 95. | 3,5,6-Trihydroxy-4',7'-dimethoxyflavone                   | M-H | <a href="#">524365</a> |
| 96. | 5,2',6'-Trihydroxy-6,7-dimethoxyflavone 2'-glucoside      | M-H | <a href="#">49505</a>  |
| 97. | 3,5,8-Trihydroxy-7,4'-dimethoxyflavone                    | M-H | <a href="#">374744</a> |

| CHEMICALS IN OM 5451 |                                                          |         |                        |
|----------------------|----------------------------------------------------------|---------|------------------------|
| No.                  | NAME                                                     | ADDUCT  | METLIN ID              |
| 1.                   | (R)(-)-Allantoin                                         | M+H     | <a href="#">63395</a>  |
| 2.                   | (S)(+)-Allantoin                                         | M+H     | <a href="#">63392</a>  |
| 3.                   | 1-O-p-Coumaroyl-beta-D-glucose                           | M+NH4   | <a href="#">91925</a>  |
| 4.                   | 2,3,4-Trihydroxybenzoic acid                             | M-H     | <a href="#">325930</a> |
| 5.                   | 2,4,5-Trihydroxybenzoic acid                             | M-H     | <a href="#">326013</a> |
| 6.                   | 2,4,6-Trihydroxybenzoic acid                             | M-H     | <a href="#">86397</a>  |
| 7.                   | 2-Bromo-3-hydroxybenzoic acid                            | M+H-H2O | <a href="#">852440</a> |
| 8.                   | 2-Bromo-5-hydroxybenzoic acid                            | M+H-H2O | <a href="#">638875</a> |
| 9.                   | 2-Bromo-6-hydroxybenzoic acid                            | M+H-H2O | <a href="#">634281</a> |
| 10.                  | 2-Ethyl-6-hydroxybenzoic acid                            | M+H     | <a href="#">276962</a> |
| 11.                  | 2-Hydroxyphenylacetic acid O-b-D-glucoside               | M-H     | <a href="#">93053</a>  |
| 12.                  | 3',5,7-Trihydroxy-4',8-dimethoxyisoflavone               | M+Na    | <a href="#">302623</a> |
| 13.                  | 3,5,8-Trihydroxy-7,4'-dimethoxyflavone                   | M+Na    | <a href="#">374744</a> |
| 14.                  | 3-Bromo-2-hydroxybenzoic acid                            | M+H-H2O | <a href="#">340341</a> |
| 15.                  | 3-Bromo-5-hydroxybenzoic acid                            | M+H-H2O | <a href="#">732273</a> |
| 16.                  | 3-Ethoxy-4-hydroxybenzoic acid                           | M+H     | <a href="#">288553</a> |
| 17.                  | 3-ethyl-2-hydroxybenzoic acid                            | M+H     | <a href="#">300561</a> |
| 18.                  | 3-Hydroxybenzoic acid                                    | M+H-H2O | <a href="#">269175</a> |
| 19.                  | 4-(2,3-Dihydroxypropoxy)-3,5-dihydroxybenzoic acid       | M+Na    | <a href="#">979387</a> |
| 20.                  | 4,4'-[Hexane-1,6-diylbis(oxy)]bis(2-hydroxybenzoic acid) | M-H     | <a href="#">893933</a> |
| 21.                  | 4',5,7-Trihydroxy-3,6-dimethoxyflavone                   | M+Na    | <a href="#">455671</a> |
| 22.                  | 4-Bromo-2-hydroxybenzoic Acid                            | M+H-H2O | <a href="#">547013</a> |
| 23.                  | 4-Bromo-3-hydroxybenzoic acid                            | M+H-H2O | <a href="#">580132</a> |
| 24.                  | 4-Hydroxybenzoic acid                                    | M+H-H2O | <a href="#">287667</a> |
| 25.                  | 4-Methoxy-(2E)-cinnamic acid                             | M+H     | <a href="#">313925</a> |
| 26.                  | 5,2',3'-Trihydroxy-7,8-dimethoxyflavone 3'-glucoside     | M-H     | <a href="#">49717</a>  |
| 27.                  | 5,2',6'-Trihydroxy-6,7-dimethoxyflavone 2'-glucoside     | M-H     | <a href="#">49505</a>  |
| 28.                  | 7-Oxostigmasterol                                        | M+H     | <a href="#">86666</a>  |
| 29.                  | Allantoic acid                                           | M+H-H2O | <a href="#">343</a>    |
| 30.                  | Allantoin                                                | M+H     | <a href="#">265134</a> |
| 31.                  | Allantoin                                                | M+H     | <a href="#">89</a>     |
| 32.                  | Benzoic acid, 2-(allyloxy)-3,5-dipropyl-, methyl ester   | M-H     | <a href="#">378753</a> |

|     |                                                                                      |                      |                        |
|-----|--------------------------------------------------------------------------------------|----------------------|------------------------|
| 33. | Benzoic acid, 2-(cyanomethyl)-                                                       | M+H                  | <a href="#">357692</a> |
| 34. | Benzoic acid, 2,2'-[carbonylbis(oxy)]bis-, dimethyl ester                            | M-H                  | <a href="#">492589</a> |
| 35. | Benzoic acid, 2,4,6-trihydroxy-                                                      | M-H                  | <a href="#">333307</a> |
| 36. | Benzoic acid, 2,4-dihydroxy-3-methyl-, methyl ester                                  | M+H                  | <a href="#">365361</a> |
| 37. | Benzoic acid, 2,4-dihydroxy-6-methyl-, methyl ester                                  | M+H                  | <a href="#">347669</a> |
| 38. | Benzoic acid, 2,4-dimethoxy-                                                         | M+H                  | <a href="#">333768</a> |
| 39. | Benzoic acid, 2-bromo-5-fluoro-, methyl ester                                        | M+Na                 | <a href="#">370122</a> |
| 40. | Benzoic acid, 2-hydroxy-, 2-propenyl ester                                           | M+H-H <sub>2</sub> O | <a href="#">355726</a> |
| 41. | Benzoic acid, 2-hydroxy-, compd. with 3-[(2S)-1-methyl-2-pyrrolidinyl]pyridine (1:1) | M-H                  | <a href="#">386004</a> |
| 42. | Benzoic acid, 2-hydroxy-3,4-dimethyl-                                                | M+H                  | <a href="#">311363</a> |
| 43. | Benzoic acid, 3-(acetyloxy)-4-methoxy-                                               | M-H                  | <a href="#">322689</a> |
| 44. | Benzoic acid, 3,4-dimethoxy-                                                         | M+H                  | <a href="#">333952</a> |
| 45. | Benzoic acid, 3,5-dimethoxy-                                                         | M+H                  | <a href="#">342868</a> |
| 46. | Benzoic acid, 3,5-dipropyl-4-((2-methylallyl)oxy)-                                   | M-H                  | <a href="#">378740</a> |
| 47. | Benzoic acid, 3-cyano-, methyl ester                                                 | M+H                  | <a href="#">357246</a> |
| 48. | Benzoic acid, 4-(acetyloxy)-3-methoxy-                                               | M-H                  | <a href="#">398467</a> |
| 49. | Benzoic acid, 4-(allyloxy)-3,5-dipropyl-, methyl ester                               | M-H                  | <a href="#">387743</a> |
| 50. | Benzoic acid, 5-bromo-2-hydroxy-                                                     | M+H-H <sub>2</sub> O | <a href="#">333659</a> |
| 51. | Benzoic acid, acetylmethyl ester                                                     | M+H-H <sub>2</sub> O | <a href="#">358947</a> |
| 52. | Benzoic acid, p-(carboxymethylsulfonyl)-                                             | M+H                  | <a href="#">524158</a> |
| 53. | Benzoic acid--[(2R,4R)-2-butyl-1,3-dithiolan-4-yl]methanol (1/1)                     | M-H                  | <a href="#">955825</a> |
| 54. | Benzoic acid--[(2R,4S)-2-butyl-1,3-dithiolan-4-yl]methanol (1/1)                     | M-H                  | <a href="#">955845</a> |
| 55. | beta-Ionone                                                                          | M+H                  | <a href="#">269858</a> |
| 56. | Caffeic acid 3-O-glucuronide                                                         | M+NH <sub>4</sub>    | <a href="#">96063</a>  |
| 57. | Caffeic acid 4-O-glucuronide                                                         | M+NH <sub>4</sub>    | <a href="#">96065</a>  |
| 58. | Carbonic acid, ethyl ester, ester with salicylic acid                                | M-H                  | <a href="#">426988</a> |
| 59. | Cinnamic acid                                                                        | M+H                  | <a href="#">386653</a> |
| 60. | Dihydro-beta-ionone                                                                  | M+H-H <sub>2</sub> O | <a href="#">317358</a> |
| 61. | Flavone, 4',7-dimethoxy-3,3',5-trihydroxy-                                           | M-H                  | <a href="#">274757</a> |
| 62. | Flavone, 5,7-dimethoxy-3,3',4'-trihydroxy-                                           | M-H                  | <a href="#">421136</a> |
| 63. | Homovanillic acid                                                                    | M+H                  | <a href="#">336519</a> |
| 64. | Hydrocinnamic acid, p-((2-chloroethyl)(2-fluoroethyl)amino)-                         | M+NH <sub>4</sub>    | <a href="#">504861</a> |
| 65. | Phenylacetic acid                                                                    | M+H                  | <a href="#">269393</a> |

|     |                                                                                                              |                      |                        |
|-----|--------------------------------------------------------------------------------------------------------------|----------------------|------------------------|
| 66. | Phenyllactic acid                                                                                            | M+H                  | <a href="#">34529</a>  |
| 67. | p-Hydroxycinnamic acid                                                                                       | M+H                  | <a href="#">354145</a> |
| 68. | Salicylic acid                                                                                               | M+H-H <sub>2</sub> O | <a href="#">287200</a> |
| 69. | Salicylic acid, 3,5-diallyl-, methyl ester                                                                   | M+H                  | <a href="#">519215</a> |
| 70. | Salicylic acid, 4-(2-(diethylamino)acetamido)-, 2-diethylaminoethyl ester, dihydrochloride                   | M+Na                 | <a href="#">425764</a> |
| 71. | Salicylic acid, 4-(2-(diethylamino)acetamido)-, pentyl ester, hydrochloride                                  | M-H                  | <a href="#">425737</a> |
| 72. | Salicylic acid, 4-(3-(diethylamino)propionamido)-, butyl ester, hydrochloride                                | M-H                  | <a href="#">425730</a> |
| 73. | Salicylic acid, 4-(3-(isopropylamino)propionamido)-, pentyl ester, hydrochloride                             | M-H                  | <a href="#">425743</a> |
| 74. | Salicylic acid, 4-(3-piperidinopropionamido)-, hexyl ester, hydrochloride                                    | M-H                  | <a href="#">425760</a> |
| 75. | Salicylic acid, 4-(N <sup>(sup 2)</sup> -(1,3-dihydroxy-2-(p-nitrophenyl)-2-propyl)oxamido)-, D-threo-, (-)- | M+NH <sub>4</sub>    | <a href="#">395938</a> |
| 76. | Salicylic acid, 4-(N <sup>(sup 2)</sup> -(1,3-dihydroxy-2-(p-nitrophenyl)-2-propyl)oxamido)-, L-threo-, (+)- | M+NH <sub>4</sub>    | <a href="#">395941</a> |
| 77. | Salicylic acid, amino-, 2-hydroxyethyl ester                                                                 | M+H                  | <a href="#">428715</a> |
| 78. | trans-o-Coumaric acid 2-glucoside                                                                            | M+NH <sub>4</sub>    | <a href="#">89390</a>  |
| 79. | trans-p-Coumaric acid 4-glucoside                                                                            | M+NH <sub>4</sub>    | <a href="#">94078</a>  |
| 80. | Vanillic acid 4-sulfate                                                                                      | M+H                  | <a href="#">96140</a>  |

| CHEMICALS IN OM 6976 |                                                                                   |         |                        |
|----------------------|-----------------------------------------------------------------------------------|---------|------------------------|
| No.                  | NAME                                                                              | ADDUCT  | METLIN ID              |
| 1.                   | (R)(-)-Allantoin                                                                  | M+H     | <a href="#">63395</a>  |
| 2.                   | (S)(+)-Allantoin                                                                  | M+H     | <a href="#">63392</a>  |
| 3.                   | 1-(2-Chloro-4-nitroanilino)-5-methoxyanthracene-9,10-dione                        | M-H     | <a href="#">754860</a> |
| 4.                   | 1-Acetyl-2,4,5,7-tetramethoxyanthracene-9,10-dione                                | M+H     | <a href="#">648775</a> |
| 5.                   | 2,2'-(Butane-1,4-diyl)diazanediyl)bis(phenylacetic acid)--hydrogen bromide (1/1)  | M-H     | <a href="#">839118</a> |
| 6.                   | 2,2'-(Decane-1,10-diyl)diazanediyl)bis(phenylacetic acid)--hydrogen bromide (1/1) | M-H     | <a href="#">841096</a> |
| 7.                   | 2,2'-(Propane-1,3-diyl)diazanediyl)bis(phenylacetic acid)--hydrogen bromide (1/1) | M-H     | <a href="#">840611</a> |
| 8.                   | 2,4-Dihydroxybenzaldehyde                                                         | M-H     | <a href="#">270019</a> |
| 9.                   | 2,4-Dihydroxybenzoic acid                                                         | M-H     | <a href="#">283902</a> |
| 10.                  | 2,5-Bis(trifluoromethyl)hydrocinnamic acid                                        | M+H     | <a href="#">492329</a> |
| 11.                  | 2,5-Dihydroxybenzoic Acid-d3                                                      | M-H     | <a href="#">602156</a> |
| 12.                  | 2-bromo-2,2-diphenylacetic acid                                                   | M-H     | <a href="#">283530</a> |
| 13.                  | 2-Bromo-3-hydroxybenzoic acid                                                     | M+H-H2O | <a href="#">852440</a> |
| 14.                  | 2-Bromo-5-hydroxybenzoic acid                                                     | M+H-H2O | <a href="#">638875</a> |
| 15.                  | 2-Bromo-6-hydroxybenzoic acid                                                     | M+H-H2O | <a href="#">634281</a> |
| 16.                  | 2-Ethyl-6-hydroxybenzoic acid                                                     | M+H     | <a href="#">276962</a> |
| 17.                  | 2-Hydroxyphenylacetic acid O-b-D-glucoside                                        | M-H     | <a href="#">93053</a>  |
| 18.                  | 3-(Trifluoromethyl)benzoic acid                                                   | M+Na    | <a href="#">303381</a> |
| 19.                  | 3-(trifluoromethyl)-Benzoic acid                                                  | M+Na    | <a href="#">1959</a>   |
| 20.                  | 3,4-Dihydroxybenzoic acid                                                         | M-H     | <a href="#">267460</a> |
| 21.                  | 3,5-Bis(trifluoromethyl)hydrocinnamic acid                                        | M+H     | <a href="#">419911</a> |
| 22.                  | 3,5-Di-tert-butyl-4-hydroxyhydrocinnamic acid                                     | M-H     | <a href="#">361036</a> |
| 23.                  | 3-[[Bis(carboxymethyl)amino]methyl]-2-hydroxybenzoic acid                         | M+Na    | <a href="#">694777</a> |
| 24.                  | 3-Bromo-2-hydroxybenzoic acid                                                     | M+H-H2O | <a href="#">340341</a> |
| 25.                  | 3-Bromo-5-hydroxybenzoic acid                                                     | M+H-H2O | <a href="#">732273</a> |
| 26.                  | 3-bromo-5-phenyl Salicylic Acid                                                   | M+H     | <a href="#">64822</a>  |
| 27.                  | 3-ethyl-2-hydroxybenzoic acid                                                     | M+H     | <a href="#">300561</a> |
| 28.                  | 3-Hexadecyl-2-hydroxybenzoic acid                                                 | M-H     | <a href="#">758916</a> |
| 29.                  | 3-Hexaprenyl-4,5-Dihydroxybenzoic acid                                            | M+NH4   | <a href="#">5976</a>   |

|     |                                                                       |         |                        |
|-----|-----------------------------------------------------------------------|---------|------------------------|
| 30. | 3-hexaprenyl-4-hydroxybenzoic acid                                    | M-H     | <a href="#">58554</a>  |
| 31. | 3-Hydroxybenzoic acid                                                 | M+H-H2O | <a href="#">269175</a> |
| 32. | 3-Nitro-4-(piperidin-1-yl)cinnamic acid                               | M-H     | <a href="#">442253</a> |
| 33. | 4-Bromo-2-hydroxybenzoic Acid                                         | M+H-H2O | <a href="#">547013</a> |
| 34. | 4-Bromo-3-hydroxybenzoic acid                                         | M+H-H2O | <a href="#">580132</a> |
| 35. | 4-Formyl-2-hydroxybenzoic acid                                        | M+H-H2O | <a href="#">392342</a> |
| 36. | 4-Formyl-3-hydroxybenzoic acid                                        | M+H-H2O | <a href="#">562697</a> |
| 37. | 4-Hydroxybenzoic acid                                                 | M+H-H2O | <a href="#">287667</a> |
| 38. | 4-tert-Butyl-2-hydroxybenzoic acid--copper (2/1)                      | M+H-H2O | <a href="#">784133</a> |
| 39. | 5-bromo-3-pheny Salicylic Acid                                        | M+H     | <a href="#">64931</a>  |
| 40. | 8-Quinolinol salicylic acid (1:1)                                     | M-H     | <a href="#">311563</a> |
| 41. | 9-Hydroxy-7-megastigmen-3-one glucoside                               | M+Na    | <a href="#">95175</a>  |
| 42. | Allantoic acid                                                        | M+H-H2O | <a href="#">343</a>    |
| 43. | Allantoin                                                             | M+H     | <a href="#">265134</a> |
| 44. | Allantoin                                                             | M+H     | <a href="#">89</a>     |
| 45. | Benzoic acid, 2-(allyloxy)-3,5-dipropyl-, methyl ester                | M-H     | <a href="#">378753</a> |
| 46. | Benzoic acid, 2,2'-[1,4-phenylenebis(carbonylimino)]bis[5-hydroxy-    | M+H     | <a href="#">493792</a> |
| 47. | Benzoic acid, 2,5-dihydroxy-                                          | M-H     | <a href="#">337551</a> |
| 48. | Benzoic acid, 2-[(1,3-benzodioxol-5-ylmethylene)amino]-, methyl ester | M-H     | <a href="#">378871</a> |
| 49. | Benzoic acid, 2-[(carboxymethyl)amino]-, monosodium salt              | M+H     | <a href="#">374048</a> |
| 50. | Benzoic acid, 2-decyl-6-hydroxy-                                      | M-H     | <a href="#">587378</a> |
| 51. | Benzoic acid, 2-hydroxy-, 2-propenyl ester                            | M+H     | <a href="#">355726</a> |
| 52. | Benzoic acid, 2-hydroxy-3,4-dimethyl-                                 | M+H     | <a href="#">311363</a> |
| 53. | Benzoic acid, 2-hydroxy-6-pentadecyl-, methyl ester                   | M-H     | <a href="#">598138</a> |
| 54. | Benzoic acid, 3,5-bis(1,1-dimethylethyl)-4-hydroxy-, ethyl ester      | M-H     | <a href="#">343827</a> |
| 55. | Benzoic acid, 3,5-dihydroxy-                                          | M-H     | <a href="#">334323</a> |
| 56. | Benzoic acid, 3,5-dimethyl-4-propoxy-, et                             |         |                        |
| 57. | Benzoic acid, 3,5-dipropyl-4-((2-methylallyl)oxy)-                    | M-H     | <a href="#">378740</a> |
| 58. | Benzoic acid, 3,5-dipropyl-4-ethoxy-, ethyl ester                     | M-H     | <a href="#">388040</a> |
| 59. | Benzoic acid, 3-hydroxy-5-methyl-                                     | M+H     | <a href="#">313087</a> |
| 60. | Benzoic acid, 4-(allyloxy)-3,5-dipropyl-, methyl ester                | M-H     | <a href="#">387743</a> |
| 61. | Benzoic acid, 4-(trifluoromethyl)-                                    | M+Na    | <a href="#">337338</a> |
| 62. | Benzoic acid, 5-bromo-2-hydroxy-                                      | M+H-H2O | <a href="#">333659</a> |

|     |                                                                                      |         |                        |
|-----|--------------------------------------------------------------------------------------|---------|------------------------|
| 63. | Benzoic acid, 5-hexadecyl-2-hydroxy-                                                 | M-H     | <a href="#">364044</a> |
| 64. | Benzoic acid, p-hydroxy-, decyl ester                                                | M-H     | <a href="#">371436</a> |
| 65. | Benzoic acid--[(2R,4R)-2-butyl-1,3-dithiolan-4-yl]methanol (1/1)                     | M-H     | <a href="#">955825</a> |
| 66. | Benzoic acid--[(2R,4R)-2-propyl-1,3-dithiolan-4-yl]methanol (1/1)                    | M-H     | <a href="#">955826</a> |
| 67. | Benzoic acid--[(2R,4S)-2-butyl-1,3-dithiolan-4-yl]methanol (1/1)                     | M-H     | <a href="#">955845</a> |
| 68. | Benzoic acid--[(2R,4S)-2-propyl-1,3-dithiolan-4-yl]methanol (1/1)                    | M-H     | <a href="#">955955</a> |
| 69. | Benzoic acid--benzene-1,3,5-triol (2/1)                                              | M+H     | <a href="#">929628</a> |
| 70. | Caffeic acid 3-O-glucuronide                                                         | M+NH4   | <a href="#">96063</a>  |
| 71. | Caffeic acid 4-O-glucuronide                                                         | M+NH4   | <a href="#">96065</a>  |
| 72. | Cinnamic acid                                                                        | M+H     | <a href="#">386653</a> |
| 73. | Dihydro-beta-ionone                                                                  | M+H-H2O | <a href="#">317358</a> |
| 74. | Dihydroferulic acid 4-O-glucuronide                                                  | M-H     | <a href="#">96081</a>  |
| 75. | Dimethyl 2,3,6,7-tetramethoxyanthracene-9,10-dicarboxylate                           | M+H     | <a href="#">881654</a> |
| 76. | Hydrocinnamic acid, p-((2-chloroethyl)(2-fluoroethyl)amino)-                         | M+NH4   | <a href="#">504861</a> |
| 77. | Phenylacetic acid                                                                    | M+H     | <a href="#">269393</a> |
| 78. | p-Hydroxycinnamic acid                                                               | M+H     | <a href="#">354145</a> |
| 79. | Salicylic acid                                                                       | M+H-H2O | <a href="#">287200</a> |
| 80. | Salicylic acid beta-D-glucoside                                                      | M-H     | <a href="#">95685</a>  |
| 81. | Salicylic acid, 3,5-dipropyl-, methyl ester                                          | M-H     | <a href="#">378749</a> |
| 82. | Salicylic acid, 4-(2-(diethylamino)acetamido)-, hexyl ester, hydrochloride           | M+H     | <a href="#">427261</a> |
| 83. | Salicylic acid, 4-(2-piperidinoacetamido)-, butyl ester, hydrochloride               | M+H-H2O | <a href="#">425724</a> |
| 84. | Salicylic acid, 4-(2-piperidinoacetamido)-, hexyl ester, hydrochloride               | M+NH4   | <a href="#">425754</a> |
| 85. | Salicylic acid, 4-(3-(cyclohexylamino)propionamido)-, ethyl ester, monohydrochloride | M+H-H2O | <a href="#">425715</a> |
| 86. | Salicylic acid, 4-(3-(diethylamino)propionamido)-, pentyl ester, hydrochloride       | M+H     | <a href="#">425741</a> |
| 87. | Salicylic acid, 4-(3-(isopropylamino)propionamido)-, hexyl ester, hydrochloride      | M+H     | <a href="#">425758</a> |
| 88. | Salicylic acid, 4-(3-piperidinopropionamido)-, pentyl ester, hydrochloride           | M+NH4   | <a href="#">425745</a> |
| 89. | Salicylic acid, 4-(3-piperidinopropionamido)-, propyl ester, hydrochloride           | M+H-H2O | <a href="#">425719</a> |



|     |                                                                         |       |                        |
|-----|-------------------------------------------------------------------------|-------|------------------------|
| 90. | Salicylic acid, 4-(4-oxo-4H-1-benzopyran-2-carboxamido)-                | M+H   | <a href="#">472951</a> |
| 91. | Salicylic acid, 4-amino-, acetate, sodium salt                          |       | <a href="#">392378</a> |
| 92. | Salicylic acid, p-butylamino-, 1-ethyl-4-piperidyl ester, hydrochloride | M+H   | <a href="#">509254</a> |
| 93. | Syringic acid-copper(II) complex                                        | M+NH4 | <a href="#">351587</a> |
| 94. | trans-o-Coumaric acid 2-glucoside                                       | M+NH4 | <a href="#">89390</a>  |
| 95. | trans-p-Coumaric acid 4-glucoside                                       | M+NH4 | <a href="#">94078</a>  |

| CHEMICALS IN OM 7347 |                                                           |         |                        |
|----------------------|-----------------------------------------------------------|---------|------------------------|
| No.                  | NAME                                                      | ADDUCT  | METLIN ID              |
| 1.                   | 2,4-Dihydroxy-6-(2-oxopropyl)benzoic acid                 | M-H     | <a href="#">410207</a> |
| 2.                   | 2-amino-3,5-dihydroxybenzoic acid                         | M+H     | <a href="#">330220</a> |
| 3.                   | 2-Ethyl-6-hydroxybenzoic acid                             | M+H-H2O | <a href="#">276962</a> |
| 4.                   | 3,4-Difluorohydrocinnamic acid                            | M+H-H2O | <a href="#">462174</a> |
| 5.                   | 3',5,7-Trihydroxy-4',8-dimethoxyisoflavone                | M+H     | <a href="#">302623</a> |
| 6.                   | 3,5,8-Trihydroxy-7,4'-dimethoxyflavone                    | M+H     | <a href="#">374744</a> |
| 7.                   | 3,5-Di-tert-butyl-4-hydroxycinnamic acid, (E)-            | M+H     | <a href="#">522176</a> |
| 8.                   | 3-ethyl-2-hydroxybenzoic acid                             | M+H-H2O | <a href="#">300561</a> |
| 9.                   | 3-Hexaprenyl-4,5-Dihydroxybenzoic acid                    | M+NH4   | <a href="#">5976</a>   |
| 10.                  | 3-hexaprenyl-4-hydroxybenzoic acid                        | M-H     | <a href="#">58554</a>  |
| 11.                  | 3-Nitro-4-(piperidin-1-yl)cinnamic acid                   | M-H     | <a href="#">442253</a> |
| 12.                  | 4-(2,3-Dihydroxypropoxy)-3,5-dihydroxybenzoic acid        | M-H     | <a href="#">979387</a> |
| 13.                  | 4-(decanoylamino)-2-hydroxybenzoic acid                   | M+NH4   | <a href="#">483818</a> |
| 14.                  | 4,4'-[Hexane-1,6-diylbis(oxy)]bis(2-hydroxybenzoic acid)  | M-H     | <a href="#">893933</a> |
| 15.                  | 4,4'-[Propane-1,3-diylbis(oxy)]bis(2-hydroxybenzoic acid) | M+H-H2O | <a href="#">893932</a> |
| 16.                  | 4-amino-2,6-dihydroxybenzoic acid                         | M+H     | <a href="#">534515</a> |
| 17.                  | 4-Formyl-2-hydroxybenzoic acid                            | M+H-H2O | <a href="#">392342</a> |
| 18.                  | 4-Formyl-3-hydroxybenzoic acid                            | M+H-H2O | <a href="#">562697</a> |
| 19.                  | 5-Amino-2,4-dihydroxybenzoic acid                         | M+H     | <a href="#">288841</a> |
| 20.                  | 7-Oxostigmasterol                                         | M+H     | <a href="#">86666</a>  |
| 21.                  | Benzoic acid, 2-(allyloxy)-3,5-dipropyl-, methyl ester    | M-H     | <a href="#">378753</a> |
| 22.                  | Benzoic acid, 2-bromo-5-fluoro-, methyl ester             | M+Na    | <a href="#">370122</a> |
| 23.                  | Benzoic acid, 2-hydroxy-3,4-dimethyl-                     | M+H-H2O | <a href="#">311363</a> |
| 24.                  | Benzoic acid, 2-hydroxy-3-iodo-                           | M+H     | <a href="#">643590</a> |

|     |                                                                                                  |         |                        |
|-----|--------------------------------------------------------------------------------------------------|---------|------------------------|
| 25. | Benzoic acid, 3-(acetyloxy)-4-methoxy-                                                           | M-H     | <a href="#">322689</a> |
| 26. | Benzoic acid, 3,5-dipropyl-4-((2-methylallyl)oxy)-                                               | M+H     | <a href="#">378740</a> |
| 27. | Benzoic acid, 3-iodosyl-                                                                         | M+H     | <a href="#">287937</a> |
| 28. | Benzoic acid, 4-(acetyloxy)-3-methoxy-                                                           | M-H     | <a href="#">398467</a> |
| 29. | Benzoic acid, 4-(allyloxy)-3,5-dipropyl-, methyl ester                                           | M+H     | <a href="#">387743</a> |
| 30. | Benzoic acid, 5-formyl-2-(2-methoxy-2-oxoethoxy)-, methyl ester                                  | M-H     | <a href="#">576670</a> |
| 31. | Benzoic acid, p-((2-((2-mercaptoethyl)amino)ethyl)amino)-, ethyl ester, hydrogen sulfate (ester) | M-H     | <a href="#">457419</a> |
| 32. | Benzoic acid--[(2R,4R)-2-propyl-1,3-dithiolan-4-yl]methanol (1/1)                                | M-H     | <a href="#">955826</a> |
| 33. | Benzoic acid--[(2R,4S)-2-propyl-1,3-dithiolan-4-yl]methanol (1/1)                                | M-H     | <a href="#">955955</a> |
| 34. | Carbonic acid, ethyl ester, ester with salicylic acid                                            | M-H     | <a href="#">426988</a> |
| 35. | Dihydroferulic acid 4-O-glucuronide                                                              | M-H     | <a href="#">96081</a>  |
| 36. | Flavone, 4',7-dimethoxy-3,3',5-trihydroxy-                                                       | M+H     | <a href="#">274757</a> |
| 37. | Flavone, 5,7-dimethoxy-3,3',4'-trihydroxy-                                                       | M+H     | <a href="#">421136</a> |
| 38. | Hydrocinnamic acid, p-((2-chloroethyl)(2-fluoroethyl)amino)-                                     | M+NH4   | <a href="#">504861</a> |
| 39. | Phenylacetic acid                                                                                | M+H-H2O | <a href="#">269393</a> |
| 40. | p-Hydroxycinnamic acid                                                                           | M-H     | <a href="#">354145</a> |
| 41. | Salicylic acid beta-D-glucoside                                                                  | M-H     | <a href="#">95685</a>  |
| 42. | Salicylic acid, 4-(2-(diethylamino)acetamido)-, propyl ester, hydrochloride                      | M+NH4   | <a href="#">425716</a> |
| 43. | Salicylic acid, 4-(2-piperidinoacetamido)-, butyl ester, hydrochloride                           | M+H-H2O | <a href="#">425724</a> |
| 44. | Salicylic acid, 4-(3-(cyclohexylamino)propionamido)-, ethyl ester, monohydrochloride             | M+H-H2O | <a href="#">425715</a> |
| 45. | Salicylic acid, 4-(3-(diethylamino)propionamido)-, ethyl ester, hydrochloride                    | M+NH4   | <a href="#">425711</a> |
| 46. | Salicylic acid, 4-(3-(isopropylamino)propionamido)-, propyl ester, hydrochloride                 | M+NH4   | <a href="#">425977</a> |
| 47. | Salicylic acid, 4-(3-piperidinopropionamido)-, propyl ester, hydrochloride                       | M+H-H2O | <a href="#">425719</a> |
| 48. | Salicylic acid, copper salt                                                                      | M+NH4   | <a href="#">451678</a> |
| 49. | Salicylic acid, p-butylamino-, 1-ethyl-4-piperidyl ester, hydrochloride                          | M+H     | <a href="#">509254</a> |

| CHEMICALS IN OM N406 |                                                                                     |         |                        |
|----------------------|-------------------------------------------------------------------------------------|---------|------------------------|
| No.                  | NAME                                                                                | ADDUCT  | METLIN ID              |
| 1.                   | (R)(-)-Allantoin                                                                    | M+H     | <a href="#">63395</a>  |
| 2.                   | (S)(+)-Allantoin                                                                    | M+H     | <a href="#">63392</a>  |
| 3.                   | {4-[(Aminoxy)methyl]phenyl}acetic acid--hydrogen bromide (1/1)                      | M+H-H2O | <a href="#">818607</a> |
| 4.                   | 2,2'-(Propane-1,3-diyl)diazanediylbis(phenylacetic acid)--hydrogen bromide (1/1)    | M+H     | <a href="#">840611</a> |
| 5.                   | 2,4-Dihydroxybenzoic acid                                                           | M+H-H2O | <a href="#">283902</a> |
| 6.                   | 2-Ethyl-6-hydroxybenzoic acid                                                       | M+H     | <a href="#">276962</a> |
| 7.                   | 3-(2-Aminoethyl)-2-hydroxybenzoic acid--hydrogen bromide (1/1)                      | M+H-H2O | <a href="#">982609</a> |
| 8.                   | 3,4-Dihydroxybenzoic acid                                                           | M+H-H2O | <a href="#">267460</a> |
| 9.                   | 3',5,7-Trihydroxy-4',8-dimethoxyisoflavone                                          | M+H     | <a href="#">302623</a> |
| 10.                  | 3,5,8-Trihydroxy-7,4'-dimethoxyflavone                                              | M+H     | <a href="#">374744</a> |
| 11.                  | 3,5-Di-tert-butyl-4-hydroxycinnamic acid, (E)-                                      | M+H     | <a href="#">522176</a> |
| 12.                  | 3-[(tert-Butoxycarbonyl)amino]-5-hydroxybenzoic acid                                | M+Na    | <a href="#">286137</a> |
| 13.                  | 3-Ethoxy-4-hydroxybenzoic acid                                                      | M+H     | <a href="#">288553</a> |
| 14.                  | 3-ethyl-2-hydroxybenzoic acid                                                       | M+H     | <a href="#">300561</a> |
| 15.                  | 3-Hexadecyl-2-hydroxybenzoic acid                                                   | M+NH4   | <a href="#">758916</a> |
| 16.                  | 4-(decanoylamino)-2-hydroxybenzoic acid                                             | M+NH4   | <a href="#">483818</a> |
| 17.                  | 4,4'-[Propane-1,3-diylbis(oxy)]bis(2-hydroxybenzoic acid)                           | M+H-H2O | <a href="#">893932</a> |
| 18.                  | 4-amino-2-hydroxybenzoic acid- 10-[2-(pyrrolidin-1-yl)ethyl]-10h-phenothiazine(1:1) | M+Na    | <a href="#">528266</a> |
| 19.                  | 4-Methoxy-(2E)-cinnamic acid                                                        | M+H-H2O | <a href="#">313925</a> |
| 20.                  | 7-Oxostigmasterol                                                                   | M+H-H2O | <a href="#">86666</a>  |
| 21.                  | Allantoic acid                                                                      | M+H-H2O | <a href="#">343</a>    |
| 22.                  | Allantoin                                                                           | M+H     | <a href="#">265134</a> |
| 23.                  | Allantoin                                                                           | M+H     | <a href="#">89</a>     |
| 24.                  | Benzoic acid--(1R,2S)-cyclohexa-3,5-diene-1,2-diol (2/1)                            | M+H     | <a href="#">952179</a> |
| 25.                  | Benzoic acid, 2-(allyloxy)-3,5-dipropyl-, methyl ester                              | M+H     | <a href="#">378753</a> |
| 26.                  | Benzoic acid, 2-(cyanomethyl)-                                                      | M+H     | <a href="#">357692</a> |
| 27.                  | Benzoic acid, 2,2'-[1,4-phenylenebis(carbonylimino)]bis-                            | M+H     | <a href="#">416785</a> |
| 28.                  | Benzoic acid, 2,4-dihydroxy-3-methyl-, methyl ester                                 | M+H     | <a href="#">365361</a> |

|     |                                                                            |                      |                        |
|-----|----------------------------------------------------------------------------|----------------------|------------------------|
| 29. | Benzoic acid, 2,4-dihydroxy-6-methyl-, methyl ester                        | M+H                  | <a href="#">347669</a> |
| 30. | Benzoic acid, 2,4-dimethoxy-                                               | M+H                  | <a href="#">333768</a> |
| 31. | Benzoic acid, 2,5-dihydroxy-                                               | M+H-H <sub>2</sub> O | <a href="#">337551</a> |
| 32. | Benzoic acid, 2-[(carboxymethyl)amino]-, monosodium salt                   | M+H                  | <a href="#">374048</a> |
| 33. | Benzoic acid, 2-hydroxy-6-pentadecyl-, methyl ester                        | M+NH <sub>4</sub>    | <a href="#">598138</a> |
| 34. | Benzoic acid, 3-(4-carboxyphenoxy)-4-methoxy-                              | M+H-H <sub>2</sub> O | <a href="#">386733</a> |
| 35. | Benzoic acid, 3,3'-[1,3-phenylenebis(carbonylimino)]bis-                   | M+H                  | <a href="#">364552</a> |
| 36. | Benzoic acid, 3,4-dimethoxy-                                               | M+H                  | <a href="#">333952</a> |
| 37. | Benzoic acid, 3,5-dihydroxy-                                               | M+H-H <sub>2</sub> O | <a href="#">334323</a> |
| 38. | Benzoic acid, 3,5-dimethoxy-                                               | M+H                  | <a href="#">342868</a> |
| 39. | Benzoic acid, 3,5-dipropyl-4-((2-methylallyl)oxy)-                         | M+H                  | <a href="#">378740</a> |
| 40. | Benzoic acid, 3-cyano-, methyl ester                                       | M+H                  | <a href="#">357246</a> |
| 41. | Benzoic acid, 4-(allyloxy)-3,5-dipropyl-, methyl ester                     | M+H                  | <a href="#">387743</a> |
| 42. | Benzoic acid, 5-formyl-2-(2-methoxy-2-oxoethoxy)-, methyl ester            | M+H                  | <a href="#">576670</a> |
| 43. | Benzoic acid, 5-hexadecyl-2-hydroxy-                                       | M+NH <sub>4</sub>    | <a href="#">364044</a> |
| 44. | beta-Ionone                                                                | M+H                  | <a href="#">269858</a> |
| 45. | Caffeic acid 3-O-glucuronide                                               | M+NH <sub>4</sub>    | <a href="#">96063</a>  |
| 46. | Caffeic acid 4-O-glucuronide                                               | M+NH <sub>4</sub>    | <a href="#">96065</a>  |
| 47. | Cinnamic acid                                                              | M+H                  | <a href="#">386653</a> |
| 48. | cis-Ferulic acid [arabinosyl-(1->3)-[glucosyl-(1->6)]-glucosyl] ester      | M+H                  | <a href="#">90133</a>  |
| 49. | Dihydro-beta-ionone                                                        | M+H                  | <a href="#">317358</a> |
| 50. | Dihydrocaffeic acid 3-O-glucuronide                                        | M+Na                 | <a href="#">96078</a>  |
| 51. | Dihydroferulic acid 4-O-glucuronide                                        | M+Na                 | <a href="#">96081</a>  |
| 52. | E-Cinnamic acid                                                            | M+H                  | <a href="#">273681</a> |
| 53. | Flavone, 4',7-dimethoxy-3,3',5-trihydroxy-                                 | M+H                  | <a href="#">274757</a> |
| 54. | Flavone, 5,7-dimethoxy-3,3',4'-trihydroxy-                                 | M+H                  | <a href="#">421136</a> |
| 55. | Homovanillic acid                                                          | M+H                  | <a href="#">336519</a> |
| 56. | Hydrocinnamic acid, p-((2-chloroethyl)(2-fluoroethyl)amino)-               | M+NH <sub>4</sub>    | <a href="#">504861</a> |
| 57. | Phenylacetic acid                                                          | M+H                  | <a href="#">269393</a> |
| 58. | p-Hydroxycinnamic acid                                                     | M+H-H <sub>2</sub> O | <a href="#">354145</a> |
| 59. | Salicylic acid, 4-(2-(diethylamino)acetamido)-, ethyl ester, hydrochloride | M+H                  | <a href="#">417446</a> |
| 60. | Salicylic acid, 4-(2-(diethylamino)acetamido)-, hexyl ester, hydrochloride | M+H                  | <a href="#">427261</a> |

|     |                                                                                                 |         |                        |
|-----|-------------------------------------------------------------------------------------------------|---------|------------------------|
| 61. | Salicylic acid, 4-(3-(diethylamino)propionamido)-, methyl ester, hydrochloride                  | M+H     | <a href="#">426173</a> |
| 62. | Salicylic acid, 4-(3-(diethylamino)propionamido)-, pentyl ester, hydrochloride                  | M+H     | <a href="#">425741</a> |
| 63. | Salicylic acid, 4-(3-(isopropylamino)propionamido)-, ethyl ester, hydrochloride                 | M+H     | <a href="#">417199</a> |
| 64. | Salicylic acid, 4-(3-(isopropylamino)propionamido)-, hexyl ester, hydrochloride                 | M+H     | <a href="#">425758</a> |
| 65. | Salicylic acid, 4-(N(sup 2)-(1,3-dihydroxy-2-(p-nitrophenyl)-2-propyl)oxamido)-, D-threo-, (-)- | M+NH4   | <a href="#">395938</a> |
| 66. | Salicylic acid, 4-(N(sup 2)-(1,3-dihydroxy-2-(p-nitrophenyl)-2-propyl)oxamido)-, L-threo-, (+)- | M+NH4   | <a href="#">395941</a> |
| 67. | Salicylic acid, 4-amino-, acetate, sodium salt                                                  | M+H     | <a href="#">392378</a> |
| 68. | Salicylic acid, amino-, 2-hydroxyethyl ester                                                    | M+H     | <a href="#">428715</a> |
| 69. | Salicylic acid, copper salt                                                                     | M+NH4   | <a href="#">451678</a> |
| 70. | Salicylic acid, methylene ester                                                                 | M+H-H2O | <a href="#">506200</a> |
| 71. | Salicylic acid, p-amino-, 1-methyl-4-piperidyl ester, hydrochloride                             | M+H     | <a href="#">509235</a> |
| 72. | Salicylic acid, p-butylamino-, 1-ethyl-4-piperidyl ester, hydrochloride                         | M+H     | <a href="#">509254</a> |
| 73. | 2-(Hexadec-9-en-1-yl)-6-hydroxybenzoic acid                                                     | M-H     | <a href="#">911630</a> |
| 74. | 2,6-Dimethoxybenzoic acid                                                                       | M-H     | <a href="#">316720</a> |
| 75. | 2-Ethyl-6-hydroxybenzoic acid                                                                   | M-H     | <a href="#">276962</a> |
| 76. | 2-Hydroxyphenylacetic acid O-b-D-glucoside                                                      | M-H     | <a href="#">93053</a>  |
| 77. | 3,5-Di-tert-butyl-4-hydroxycinnamic acid, (E)-                                                  | M-H     | <a href="#">522176</a> |
| 78. | 3,5-Di-tert-butyl-4-hydroxyhydrocinnamic acid                                                   | M-H     | <a href="#">361036</a> |
| 79. | 3-Ethoxy-4-hydroxybenzoic acid                                                                  | M-H     | <a href="#">288553</a> |
| 80. | 3-ethyl-2-hydroxybenzoic acid                                                                   | M-H     | <a href="#">300561</a> |
| 81. | 3-hexaprenyl-4-hydroxybenzoic acid                                                              | M-H     | <a href="#">58554</a>  |
| 82. | 3-Hydroxybenzoic acid                                                                           | M-H     | <a href="#">269175</a> |
| 83. | 4-Hydroxybenzoic acid                                                                           | M-H     | <a href="#">287667</a> |
| 84. | 4-hydroxybenzoic acid- 1-phenylpiperazine(1:1)                                                  | M-H     | <a href="#">547246</a> |
| 85. | 8-Quinolinol salicylic acid (1:1)                                                               | M-H     | <a href="#">311563</a> |
| 86. | Benzoic acid, 2-(allyloxy)-3,5-dipropyl-, methyl ester                                          | M-H     | <a href="#">378753</a> |
| 87. | Benzoic acid, 2,4-dihydroxy-3-methyl-, methyl ester                                             | M-H     | <a href="#">365361</a> |
| 88. | Benzoic acid, 2,4-dihydroxy-6-methyl-, methyl ester                                             | M-H     | <a href="#">347669</a> |
| 89. | Benzoic acid, 2,4-dimethoxy-                                                                    | M-H     | <a href="#">333768</a> |

|      |                                                                                      |     |                        |
|------|--------------------------------------------------------------------------------------|-----|------------------------|
| 90.  | Benzoic acid, 2-[(1,3-benzodioxol-5-ylmethylene)amino]-, methyl ester                | M-H | <a href="#">378871</a> |
| 91.  | Benzoic acid, 2-decyl-6-hydroxy-                                                     | M-H | <a href="#">587378</a> |
| 92.  | Benzoic acid, 2-hydroxy-, compd. with 3-[(2S)-1-methyl-2-pyrrolidinyl]pyridine (1:1) | M-H | <a href="#">386004</a> |
| 93.  | Benzoic acid, 2-hydroxy-3,4-dimethyl-                                                | M-H | <a href="#">311363</a> |
| 94.  | Benzoic acid, 3-(acetyloxy)-4-methoxy-                                               | M-H | <a href="#">322689</a> |
| 95.  | Benzoic acid, 3,4-dimethoxy-                                                         | M-H | <a href="#">333952</a> |
| 96.  | Benzoic acid, 3,5-bis(1,1-dimethylethyl)-4-hydroxy-, ethyl ester                     | M-H | <a href="#">343827</a> |
| 97.  | Benzoic acid, 3,5-bis(acetyloxy)-4-(phenylmethoxy)-, methyl ester                    | M-H | <a href="#">601090</a> |
| 98.  | Benzoic acid, 3,5-dimethoxy-                                                         | M-H | <a href="#">342868</a> |
| 99.  | Benzoic acid, 3,5-dimethyl-4-propoxy-, ethyl ester                                   | M-H | <a href="#">387554</a> |
| 100. | Benzoic acid, 3,5-dipropyl-4-((2-methylallyl)oxy)-                                   | M-H | <a href="#">378740</a> |
| 101. | Benzoic acid, 3,5-dipropyl-4-ethoxy-, ethyl ester                                    | M-H | <a href="#">388040</a> |
| 102. | Benzoic acid, 4-(acetyloxy)-3-methoxy-                                               | M-H | <a href="#">398467</a> |
| 103. | Benzoic acid, 4-(allyloxy)-3,5-dipropyl-, methyl ester                               | M-H | <a href="#">387743</a> |
| 104. | Benzoic acid, p-hydroxy-, decyl ester                                                | M-H | <a href="#">371436</a> |
| 105. | Benzoic acid--[(2R,4R)-2-butyl-1,3-dithiolan-4-yl]methanol (1/1)                     | M-H | <a href="#">955825</a> |
| 106. | Benzoic acid--[(2R,4R)-2-propyl-1,3-dithiolan-4-yl]methanol (1/1)                    | M-H | <a href="#">955826</a> |
| 107. | Benzoic acid--[(2R,4S)-2-butyl-1,3-dithiolan-4-yl]methanol (1/1)                     | M-H | <a href="#">955845</a> |
| 108. | Benzoic acid--[(2R,4S)-2-propyl-1,3-dithiolan-4-yl]methanol (1/1)                    | M-H | <a href="#">955955</a> |
| 109. | Carbonic acid, ethyl ester, ester with salicylic acid                                | M-H | <a href="#">426988</a> |
| 110. | Dihydroferulic acid 4-O-glucuronide                                                  | M-H | <a href="#">96081</a>  |
| 111. | Homovanillic acid                                                                    | M-H | <a href="#">336519</a> |
| 112. | Hydrocinnamic acid, m-(bis(2-fluoroethyl)amino)-                                     | M-H | <a href="#">406340</a> |
| 113. | Hydrocinnamic acid, p-(bis(2-fluoroethyl)amino)-                                     | M-H | <a href="#">503631</a> |
| 114. | p-Hydroxycinnamic acid                                                               | M-H | <a href="#">354145</a> |
| 115. | Salicylic acid                                                                       | M-H | <a href="#">287200</a> |
| 116. | Salicylic acid beta-D-glucoside                                                      | M-H | <a href="#">95685</a>  |
| 117. | Salicylic acid, 3,5-dipropyl-, methyl ester                                          | M-H | <a href="#">378749</a> |
| 118. | Salicylic acid, 4-(3-piperidinopropionamido)-, hexyl ester, hydrochloride            | M-H | <a href="#">425760</a> |
| 119. | Salicylic acid, heptanoate                                                           | M-H | <a href="#">378999</a> |

| CHEMICALS IN OM 380 |                                                                                                                             |         |                        |
|---------------------|-----------------------------------------------------------------------------------------------------------------------------|---------|------------------------|
| No.                 | NAME                                                                                                                        | ADDUCT  | METLIN ID              |
| 1.                  | (R)(-)-Allantoin                                                                                                            | M+H     | <a href="#">63395</a>  |
| 2.                  | (S)(+)-Allantoin                                                                                                            | M+H     | <a href="#">63392</a>  |
| 3.                  | 2-(Hexadec-9-en-1-yl)-6-hydroxybenzoic acid                                                                                 | M-H     | <a href="#">911630</a> |
| 4.                  | 2,2'-(Decane-1,10-diyl)diazanediylbis(phenylacetic acid)--hydrogen bromide (1/1)                                            | M-H     | <a href="#">841096</a> |
| 5.                  | 2,4-Dihydroxy-6-(2-oxopropyl)benzoic acid                                                                                   | M-H     | <a href="#">410207</a> |
| 6.                  | 2,6-Dimethoxybenzoic acid                                                                                                   | M+H     | <a href="#">316720</a> |
| 7.                  | 2-bromo-2,2-diphenylacetic acid                                                                                             | M-H     | <a href="#">283530</a> |
| 8.                  | 2-Bromo-3-hydroxybenzoic acid                                                                                               | M+H-H2O | <a href="#">852440</a> |
| 9.                  | 2-Bromo-5-hydroxybenzoic acid                                                                                               | M+H-H2O | <a href="#">638875</a> |
| 10.                 | 2-Bromo-6-hydroxybenzoic acid                                                                                               | M+H-H2O | <a href="#">634281</a> |
| 11.                 | 2-Ethyl-6-hydroxybenzoic acid                                                                                               | M+H     | <a href="#">276962</a> |
| 12.                 | 2-hydroxybenzoic acid- 5-(4-chlorophenyl)-6-ethylpyrimidine-2,4-diamine(1:1)                                                | M+H-H2O | <a href="#">535077</a> |
| 13.                 | 2-Hydroxyphenylacetic acid O-b-D-glucoside                                                                                  | M-H     | <a href="#">93053</a>  |
| 14.                 | 3,5,8-Trihydroxy-7,4'-dimethoxyflavone                                                                                      | M+H     | <a href="#">374744</a> |
| 15.                 | 3,5-Di-tert-butyl-4-hydroxycinnamic acid, (E)-                                                                              | M-H     | <a href="#">522176</a> |
| 16.                 | 3,5-Di-tert-butyl-4-hydroxyhydrocinnamic acid                                                                               | M-H     | <a href="#">361036</a> |
| 17.                 | 3-Bromo-2-hydroxybenzoic acid                                                                                               | M+H-H2O | <a href="#">340341</a> |
| 18.                 | 3-Bromo-5-hydroxybenzoic acid                                                                                               | M+H-H2O | <a href="#">732273</a> |
| 19.                 | 3-Ethoxy-4-hydroxybenzoic acid                                                                                              | M+H     | <a href="#">288553</a> |
| 20.                 | 3-ethyl-2-hydroxybenzoic acid                                                                                               | M+H     | <a href="#">300561</a> |
| 21.                 | 3-Hexadecyl-2-hydroxybenzoic acid                                                                                           | M+NH4   | <a href="#">758916</a> |
| 22.                 | 3-Hexaprenyl-4,5-Dihydroxybenzoic acid                                                                                      | M-H     | <a href="#">5976</a>   |
| 23.                 | 3-hexaprenyl-4-hydroxybenzoic acid                                                                                          | M-H     | <a href="#">58554</a>  |
| 24.                 | 3-Nitro-4-(piperidin-1-yl)cinnamic acid                                                                                     | M-H     | <a href="#">442253</a> |
| 25.                 | 4-(decanoylamino)-2-hydroxybenzoic acid                                                                                     | M+NH4   | <a href="#">483818</a> |
| 26.                 | 4,4'-[Propane-1,3-diylbis(oxy)]bis(2-hydroxybenzoic acid)                                                                   | M+H-H2O | <a href="#">893932</a> |
| 27.                 | 4-[(E)-{[4-(Bis[2-(methanesulfonyl)oxy]ethyl)amino]phenyl)methylidene}amino]-2-hydroxybenzoic acid--hydrogen chloride (1/1) | M-H     | <a href="#">787376</a> |
| 28.                 | 4-Bromo-2-hydroxybenzoic Acid                                                                                               | M+H-H2O | <a href="#">547013</a> |
| 29.                 | 4-Bromo-3-hydroxybenzoic acid                                                                                               | M+H-H2O | <a href="#">580132</a> |
| 30.                 | 7-Oxostigmasterol                                                                                                           | M+H-H2O | <a href="#">86666</a>  |
| 31.                 | 8-Quinolinol salicylic acid (1:1)                                                                                           | M-H     | <a href="#">311563</a> |
| 32.                 | 9-Hydroxy-7-megastigmen-3-one glucoside                                                                                     | M+Na    | <a href="#">95175</a>  |
| 33.                 | Allantoin                                                                                                                   | M+H     | <a href="#">265134</a> |
| 34.                 | Allantoin                                                                                                                   | M+H     | <a href="#">89</a>     |



|     |                                                                       |                      |                        |
|-----|-----------------------------------------------------------------------|----------------------|------------------------|
| 35. | Benzoic acid, 2-(allyloxy)-3,5-dipropyl-, methyl ester                | M-H                  | <a href="#">378753</a> |
| 36. | Benzoic acid, 2,2'-[1,4-phenylenebis(carbonylimino)]bis[5-hydroxy-    | M+H                  | <a href="#">493792</a> |
| 37. | Benzoic acid, 2,4-dihydroxy-6-methyl-, methyl ester                   | M+H                  | <a href="#">347669</a> |
| 38. | Benzoic acid, 2,4-dimethoxy-                                          | M+H                  | <a href="#">333768</a> |
| 39. | Benzoic acid, 2-[(1,3-benzodioxol-5-ylmethylene)amino]-, methyl ester | M-H                  | <a href="#">378871</a> |
| 40. | Benzoic acid, 2-hydroxy-, 2-propenyl ester                            | M+H-H <sub>2</sub> O | <a href="#">355726</a> |
| 41. | Benzoic acid, 2-hydroxy-3,4-dimethyl-                                 | M+H                  | <a href="#">311363</a> |
| 42. | Benzoic acid, 2-hydroxy-6-pentadecyl-, methyl ester                   | M+NH <sub>4</sub>    | <a href="#">598138</a> |
| 43. | Benzoic acid, 3-(acetyloxy)-4-methoxy-                                | M-H                  | <a href="#">322689</a> |
| 44. | Benzoic acid, 3,4-dimethoxy-                                          | M+H                  | <a href="#">333952</a> |
| 45. | Benzoic acid, 3,5-bis(1,1-dimethylethyl)-4-hydroxy-, ethyl ester      | M-H                  | <a href="#">343827</a> |
| 46. | Benzoic acid, 3,5-dimethoxy-                                          | M+H                  | <a href="#">342868</a> |
| 47. | Benzoic acid, 3,5-dimethyl-4-propoxy-, ethyl ester                    | M-H                  | <a href="#">387554</a> |
| 48. | Benzoic acid, 3,5-dipropyl-4-((2-methylallyl)oxy)-                    | M-H                  | <a href="#">378740</a> |
| 49. | Benzoic acid, 3,5-dipropyl-4-ethoxy-, ethyl ester                     | M-H                  | <a href="#">388040</a> |
| 50. | Benzoic acid, 3-cyano-, methyl ester                                  | M+H                  | <a href="#">357246</a> |
| 51. | Benzoic acid, 4-(acetyloxy)-3-methoxy-                                | M-H                  | <a href="#">398467</a> |
| 52. | Benzoic acid, 4-(allyloxy)-3,5-dipropyl-, methyl ester                | M-H                  | <a href="#">387743</a> |
| 53. | Benzoic acid, 5-bromo-2-hydroxy-                                      | M+H-H <sub>2</sub> O | <a href="#">333659</a> |
| 54. | Benzoic acid, 5-hexadecyl-2-hydroxy-                                  | M+NH <sub>4</sub>    | <a href="#">364044</a> |
| 55. | Benzoic acid, acetylmethyl ester                                      | M+H-H <sub>2</sub> O | <a href="#">358947</a> |
| 56. | Benzoic acid, p-hydroxy-, decyl ester                                 | M-H                  | <a href="#">371436</a> |
| 57. | Benzoic acid--[(2R,4R)-2-butyl-1,3-dithiolan-4-yl]methanol (1/1)      | M-H                  | <a href="#">955825</a> |
| 58. | Benzoic acid--[(2R,4R)-2-propyl-1,3-dithiolan-4-yl]methanol (1/1)     | M-H                  | <a href="#">955826</a> |
| 59. | Benzoic acid--[(2R,4S)-2-butyl-1,3-dithiolan-4-yl]methanol (1/1)      | M-H                  | <a href="#">955845</a> |
| 60. | Benzoic acid--[(2R,4S)-2-propyl-1,3-dithiolan-4-yl]methanol (1/1)     | M-H                  | <a href="#">955955</a> |
| 61. | beta-Ionone                                                           | M+H                  | <a href="#">269858</a> |
| 62. | Caffeic acid 3-O-glucuronide                                          | M+NH <sub>4</sub>    | <a href="#">96063</a>  |
| 63. | Caffeic acid 4-O-glucuronide                                          | M+NH <sub>4</sub>    | <a href="#">96065</a>  |
| 64. | Carbonic acid, ethyl ester, ester with salicylic acid                 | M-H                  | <a href="#">426988</a> |
| 65. | Cinnamic acid                                                         | M+H                  | <a href="#">386653</a> |



|     |                                                                                      |         |                        |
|-----|--------------------------------------------------------------------------------------|---------|------------------------|
| 66. | Dihydroferulic acid 4-O-glucuronide                                                  | M-H     | <a href="#">96081</a>  |
| 67. | E-Cinnamic acid                                                                      | M+H     | <a href="#">273681</a> |
| 68. | Flavone, 4',7-dimethoxy-3,3',5-trihydroxy-                                           | M+H     | <a href="#">274757</a> |
| 69. | Flavone, 5,7-dimethoxy-3,3',4'-trihydroxy-                                           | M+H     | <a href="#">421136</a> |
| 70. | Homovanillic acid                                                                    | M+H     | <a href="#">336519</a> |
| 71. | Hydrocinnamic acid, p-((2-chloroethyl)(2-fluoroethyl)amino)-                         | M+NH4   | <a href="#">504861</a> |
| 72. | Phenylacetic acid                                                                    | M+H-H2O | <a href="#">269393</a> |
| 73. | p-Hydroxycinnamic acid                                                               | M+H-H2O | <a href="#">354145</a> |
| 74. | Salicylic acid beta-D-glucoside                                                      | M-H     | <a href="#">95685</a>  |
| 75. | Salicylic acid, 3,5-diallyl-, methyl ester                                           | M+H     | <a href="#">519215</a> |
| 76. | Salicylic acid, 3,5-dipropyl-, methyl ester                                          | M-H     | <a href="#">378749</a> |
| 77. | Salicylic acid, 4-(2-piperidinoacetamido)-, butyl ester, hydrochloride               | M+H-H2O | <a href="#">425724</a> |
| 78. | Salicylic acid, 4-(3-(cyclohexylamino)propionamido)-, ethyl ester, monohydrochloride | M+H-H2O | <a href="#">425715</a> |
| 79. | Salicylic acid, 4-(3-moprholinopropionamido)-, butyl ester, hydrochloride            | M+H     | <a href="#">425735</a> |
| 80. | Salicylic acid, 4-(3-piperidinopropionamido)-, propyl ester, hydrochloride           | M+H-H2O | <a href="#">425719</a> |
| 81. | Salicylic acid, p-amino-, 1-methyl-4-piperidyl ester, hydrochloride                  | M+H     | <a href="#">509235</a> |
| 82. | Salicylic acid, p-butylamino-, 1-ethyl-4-piperidyl ester, hydrochloride              | M+H     | <a href="#">509254</a> |

\*: The identification level is 2.
